# Supplementary material for: Impact of the urgent care telephone service NHS 111 pilot sites: a controlled before and after study
Source: PubMed Central journal article supplement — BMJ Open. 2013 Nov 12;3(11):e003451. doi: 10.1136/bmjopen-2013-003451 (PMC3831104; doi:10.1136/bmjopen-2013-003451), 2013-11-12
Supplement: bmjopen-2013-003451.draft_revisions.pdf [file bmjopen-2013-003451.draft_revisions.pdf]

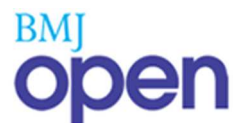

**Impact of the urgent care telephone service NHS 111 pilot sites: a controlled before and after study**

|                                 |                                                                                                                                                                                                                                                                                                                                                                                                         |
|---------------------------------|---------------------------------------------------------------------------------------------------------------------------------------------------------------------------------------------------------------------------------------------------------------------------------------------------------------------------------------------------------------------------------------------------------|
| Journal:                        | <i>BMJ Open</i>                                                                                                                                                                                                                                                                                                                                                                                         |
| Manuscript ID:                  | bmjopen-2013-003451                                                                                                                                                                                                                                                                                                                                                                                     |
| Article Type:                   | Research                                                                                                                                                                                                                                                                                                                                                                                                |
| Date Submitted by the Author:   | 20-Jun-2013                                                                                                                                                                                                                                                                                                                                                                                             |
| Complete List of Authors:       | Turner, Janette; University of Sheffield, ScHARR<br>O'Cathain, Alicia; The University of Sheffield, School of Health and Related Research (ScHARR)<br>Knowles, Emma; The University of Sheffield, School of Health and Related Research (ScHARR)<br>Nicholl, Jonathan; University of Sheffield, Medical Care Research Unit; The University of Sheffield, School of Health and Related Research (ScHARR) |
| <b>Primary Subject Heading</b>: | Emergency medicine                                                                                                                                                                                                                                                                                                                                                                                      |
| Secondary Subject Heading:      | Health policy, Health services research                                                                                                                                                                                                                                                                                                                                                                 |
| Keywords:                       | ACCIDENT & EMERGENCY MEDICINE, Health policy < HEALTH SERVICES ADMINISTRATION & MANAGEMENT, Organisation of health services < HEALTH SERVICES ADMINISTRATION & MANAGEMENT, Information technology < BIOTECHNOLOGY & BIOINFORMATICS                                                                                                                                                                      |
|                                 |                                                                                                                                                                                                                                                                                                                                                                                                         |

SCHOLARONE™  
Manuscripts

Only

1  
2  
3 **Impact of the urgent care telephone service NHS 111 pilot sites: a controlled before and**  
4 **after study**  
5  
6  
7

8  
9 J Turner

10  
11 Senior Research Fellow, Medical Care Research Unit, ScHARR, University of Sheffield, Regent  
12 Court, 30 Regent Street, Sheffield S1 4DA  
13

14  
15 J Nicholl

16  
17 Dean, Medical Care Research Unit, ScHARR, University of Sheffield, Regent Court, 30 Regent  
18 Street, Sheffield S1 4DA  
19

20  
21 A O’Cathain

22  
23 Professor of Health Services Research, Medical Care Research Unit, ScHARR, University of  
24 Sheffield, Regent Court, 30 Regent Street, Sheffield S1 4DA  
25

26  
27 E Knowles

28  
29 Research Fellow, Medical Care Research Unit, ScHARR, University of Sheffield, Regent Court,  
30 30 Regent Street, Sheffield S1 4DA  
31

32  
33 Corresponding author: [j.turner@sheffield.ac.uk](mailto:j.turner@sheffield.ac.uk)  
34

35  
36 Medical Care Research Unit, ScHARR, University of Sheffield, Regent Court, 30 Regent  
37 Street, Sheffield S1 4DA  
38  
39  
40  
41  
42  
43  
44  
45  
46  
47  
48  
49  
50  
51  
52  
53  
54  
55  
56  
57  
58  
59  
60

## Abstract

**Objectives:** To measure the impact of the urgent care telephone service NHS 111 on the emergency and urgent care system.

**Design:** Controlled before and after study using routine data.

**Setting:** Four pilot sites and three control sites covering a total population of 3.6million in England, UK.

**Participants and data:** Routine data on 36 months of use of emergency ambulance service calls and incidents, emergency department attendances, urgent care contacts (GP out of hours, walk in and urgent care centres) and calls to the telephone triage service NHS Direct.

**Intervention:** NHS 111, a new 24 hour 7 day a week telephone service for non-emergency health problems, operated by trained non-clinical call handlers with clinical support from nurse advisors, using NHS Pathways software to triage calls to different services and home care.

**Main outcomes:** Changes in use of emergency and urgent care services.

**Results:** NHS 111 triaged 277,163 calls in the first year of operation for a population of 1.8 million. There was no change overall in emergency ambulance calls, emergency department attendances or urgent care use. There was a 19.3% reduction in calls to NHS Direct (95%CI -24.6% to14.0%) and a 2.9% increase in emergency ambulance incidents (95%CI 1.0% to 4.8%). There was an increase in activity overall in the emergency and urgent care system in each site ranging from 4.7 -12% per month and this remained when assuming that NHS 111 will eventually take all NHS Direct and GP Out of Hours calls.

**Conclusions:** In its first year of operation in four pilot sites NHS 111 did not deliver the expected system benefits of reducing calls to the 999 ambulance service or shifting patients to urgent rather than emergency care. There is potential that this type of service increases overall demand for urgent care.

## Article Summary

### Article Focus

- NHS 111 is a new telephone service for accessing urgent care where calls are assessed by non-clinical call handlers with clinician support.
- The aim of the service is to direct callers to the “right place, first time” and improve emergency and urgent care system efficiency.
- We have evaluated the first year of operation in four pilot sites to assess whether the new service achieves the objective of improving system efficiency.

### Key messages

- In the first year of operation 72% of triaged calls to NHS 111 were managed by non-clinical call handlers and the service met quality standards.
- NHS 111 did not achieve the objective of increasing emergency and urgent care system efficiency. There was a significant increase in emergency ambulance incidents and an overall increase in use of emergency and urgent care services.

### Strengths and limitations

- This is the first controlled evaluation of the impact of the NHS 111 service on the emergency and urgent care system in England. This is timely as the service is being rolled out nationally.
- There is limited evidence on the use of non-clinical call handlers to triage requests for urgent care and this study adds to the evidence base.
- Although we conducted a controlled study other system changes made it difficult to isolate the effects of NHS 111 and we were unable to assess the potential impact on in hours GP services.

## **Introduction**

A consultation by policy makers in England identified that a key frustration in the general population was access to urgent care.[1] Problems faced by users of emergency and urgent care included a lack of awareness of services available, confusion about which service to access and multiple service contacts for the same episode.[2] In England in 2000 a national 24 hour telephone line for advice about health problems, NHS Direct, was established to address similar frustrations. Calls are answered by a non-clinical call handler and assessed by a nurse either immediately or with a later call back. Despite this service the national consultation found that access problems persisted.[1]

NHS 111 was developed as a solution to these problems by offering a telephone service to manage requests for urgent help[3] with some key differences from NHS Direct - access via a free to call, easily remembered three digit telephone number '111'; calls answered and assessed immediately by a trained non-clinical call handler without waiting or call backs; only some calls assessed by a nurse; and integration of the assessment system with services enabling direct referral to, or appointments to be made with, some services at the time of the call.

The expected benefits of NHS 111 were to improve access to urgent care, increase efficiency by directing people to the 'right place first time', increase satisfaction with urgent care and the national health service (NHS) generally, and in the longer term reduce unnecessary calls to the 999 emergency ambulance service and so begin to rectify concerns about inappropriate use of emergency services.[4]

NHS 111 was established in four pilot sites in England in 2010. It is rapidly becoming available nationally and there is international interest in telephone access to urgent care via non-clinical triage. A mixed methods evaluation focusing on processes, outcomes and costs was conducted in the four pilot sites. We report here on the specific outcome of NHS 111 improving efficiency of service use across the emergency and urgent care system by shifting care from emergency to urgent services. The objective was to assess the impact of NHS 111 on the emergency and urgent care system by examining demand for other urgent and emergency care services to detect if there was any change in how services were used.

## **Methods**

### **Setting and service**

Pilot services were established in four geographical areas defined by primary care trusts, the health care commissioning organisations operating in England in 2010. Durham & Darlington is an urban area with a population of around 606,000; Nottingham is a city of around 300,000 with a large minority ethnic population; Luton is a city of around 200,000 with a large minority ethnic population; and Lincolnshire is a largely rural area with a city, of

1  
2  
3 population 700,000. The four sites were chosen by the English Department of Health  
4 following a request for expressions of interest from commissioning organisations already  
5 planning or considering changing telephone access to urgent care. Call handling was  
6 provided by an ambulance service in one site and NHS Direct in three sites. In all sites NHS  
7 111 could be accessed directly by dialling "111" or indirectly where GP out of hours call  
8 handling services were routed to NHS 111. Calls to NHS 111 are answered and assessed by  
9 trained non-clinical call handlers using the NHS Pathways assessment system.[5] If needed,  
10 calls can be transferred for additional assessment and advice from an onsite trained nurse.  
11 At the end of the assessment callers are matched to the most appropriate service available  
12 at the time of their call from a range of services within the callers' locality using an  
13 electronic Directory of Services linked to the assessment system. This can include  
14 emergency ambulance, emergency department, urgent care centre, walk in centre, minor  
15 injury unit, general practice (GP) out of hours service, in hours GP, community services, or  
16 home care. Referrals can be made to some services by NHS 111 at the time of the call, for  
17 example, direct dispatch of an emergency ambulance, appointment booking and transfer of  
18 the call to another telephone based service. A description of the NHS 111 service is  
19 provided as a supplemental file [S1].  
20  
21  
22  
23  
24  
25

## 26 Design

27  
28  
29 The design of this part of the evaluation was a controlled before and after study using a time  
30 series analysis of routine service activity data. Control sites were selected to match the pilot  
31 sites using a two stage process: 1) potential sites were identified by primary care trust area  
32 type (county or city), urban/rural mix and same Strategic Health Authority or nearest  
33 neighbour; 2) from 12 potential sites the final choice was made after matching for a range of  
34 18 criteria based on population demographics, lifestyle, health profile and health service  
35 use. A table listing all criteria is provided as a supplemental file [S2]. It was important that  
36 control sites had no plans to introduce NHS 111 or make major changes to their emergency  
37 and urgent care system in the time frame of the evaluation. We identified three suitable  
38 control sites: North of Tyne, Leicester and Norfolk. Leicester was the best match for two  
39 pilot sites (Nottingham and Luton). The characteristics of the pilot and control sites are  
40 presented in Table 1. For the analyses reported here data from all pilot sites were combined  
41 and compared with data from all control sites. Randomisation of sites to be pilots or  
42 controls was not possible because the four pilot sites were pre-selected by the Department  
43 of Health.  
44  
45  
46  
47  
48  
49

50 The four pilot sites became fully operational at different times from July to December 2010.  
51 The study periods used were the first full year of operation of NHS 111 and the  
52 corresponding 2 years prior to the service starting.  
53  
54  
55  
56  
57  
58  
59  
60

## Participants

Participants were users of the emergency and urgent care systems in the seven pilot and control sites recorded in routine service activity data as having accessed and used a range of emergency or urgent care services during the study periods.

## Data collection

### Use of NHS 111

A minimum data set (MDS) was created by the English Department of Health to provide information on NHS 111 service operation. All NHS 111 services submit monthly data and a MDS of activity for combined and individual services is published each month by the Department of Health.<sup>[6]</sup> The MDS records activity include numbers of: calls to the service; abandoned calls; triaged calls and transfer times for calls requiring clinical advice from a nurse. The dispositions of NHS 111 calls are recorded in five main categories: 1) ambulance dispatches; 2) recommended to attend Emergency Department; 3) recommended to attend primary and community care (including GP, urgent care, dental and pharmacy services); 4) recommended to attend another service (including community nursing, midwives, social services, opticians); 5) not recommended to attend a service (including home or self care and health information). We used the monthly routine minimum data set counts for each pilot site for the first year of operation to describe call volumes, numbers and proportions of triaged calls and calls passed for nurse assessment and the disposition arrived at following NHS Pathways assessment.

### Routine data on use of key services

NHS 111 had the potential to produce an impact on activity across a range of emergency and urgent care services: calls to the emergency ambulance service; ambulance incidents, that is, an ambulance sent to the scene of the emergency; emergency department (ED) attendances; contacts with urgent care services such as GP out of hours, urgent care centres, walk in centres or minor injury units; the telephone triage service NHS Direct; same day general practice attendances; and a range of community services such as district nursing, dentists and pharmacies. Data are routinely available for the first five services only. We collected monthly counts of use of these services (ambulance calls and incidents, ED, urgent care and NHS Direct) by residents in the seven geographical areas – four pilot and three control sites - for 24 months prior to the start of NHS 111 (2008-10) and the same data plus calls to NHS 111 in the pilot areas for 12 months after (2010-11). Due to a lack of data availability for separate urgent care services, we had to combine data for out of hours primary care contacts, walk in centre attendances and urgent care centre attendances. The sources of this data were NHS data collections (Secondary Users Service and Weekly Situation reports) and local management information reports provided by the study sites.

1  
2  
3 This data was collected and collated by the Department of Health Commissioning Analysis  
4 and Intelligence Team.  
5

6  
7 We also needed to account for changes to services in the emergency and urgent care  
8 system other than NHS 111 occurring in the 36 months. NHS 111 leads and control site  
9 evaluation contacts were asked to provide details of changes to emergency and urgent care  
10 services occurring in study sites during the study time periods. We also searched primary  
11 care trust annual reports for 2009/10 and 2010/11 for each study site to identify any  
12 reported major changes to the emergency and urgent care system.  
13  
14

## 15 16 17 **Analysis**

18  
19 For the service use analysis we fitted a time series regression model [7] to the combined  
20 pilot site counts to test for preliminary evidence that service use had changed over time.  
21 This model consisted of a month effect to help explain variation due to seasonal  
22 fluctuations, an overall trend, a before and after step term for other potentially significant  
23 changes introduced into the pilot site, and a term for before and after the time when NHS  
24 111 was launched.  
25  
26

27 We then tested for changes in the pilot sites compared to the control sites using time series  
28 regression to test for the impact of NHS 111. We used a simple model with three main  
29 elements: 1) The basic model, consisting of a linear time trend in activity over the 36 months  
30 constrained to be the same in the pilot and control sites, plus a seasonal effect and a site  
31 effect. 2) Site specific before and after terms to allow for effects of potentially significant  
32 service changes other than NHS 111 introduced during the 36 months e.g. relocation of an  
33 emergency department. 3) A term for the regression of the monthly activity counts on the  
34 volume of NHS 111 calls that were triaged that month (the 'dose'). By definition the dose is  
35 zero for all months in the control sites and up until the launch of NHS 111 in the pilot sites.  
36 This regression allowed us to directly estimate the impact of different levels of NHS 111  
37 activity.  
38  
39

40  
41 We used the regression coefficient to estimate the impact on monthly service use per  
42 thousand NHS 111 calls for the pilot sites. The models were fitted and coefficients and  
43 standard errors estimated assuming normal errors with constant variance in the monthly  
44 activity counts. To check the assumption of constant variance, we also fitted models to the  
45 square root of the counts which helps stabilise the variance. This produced no important  
46 differences in fit so results using the raw count models are reported here. We used the  
47 Prais-Winsten procedure in STATA version 12 to fit the time series regression models.[8]  
48  
49  
50  
51  
52  
53  
54  
55  
56  
57  
58  
59  
60



## **Results**

### Use of NHS 111

In the first year of operation over 400,000 calls were made to NHS 111 (Table 2). Two thirds were direct dial of the telephone number '111' by members of the general public and the other third were routed to the service from GP out of hours services. 22% of calls were unanswerable because the caller hung up within 30 seconds. These calls were predominately not intended for NHS 111 but were from people calling their general practice in the morning to make an appointment with their GP before the out of hours rerouting mechanism was switched off. 98% of answerable calls were answered and 277,163 (78%) of these were triaged by a call handler using the NHS Pathways assessment system. Reasons for not triaging calls were that the caller hung up, the call was transferred without triage (for example for a 999 ambulance), or health information only was given. The annual rate of triaged calls per 1000 population was 154. All pilot sites met national quality requirements for call abandonment rates of no more than 5%, and 95% of calls answered within 60 seconds. 28% of calls were transferred to a nurse for clinical advice although transfers were lower in the ambulance service provided site (21.3%) than in the NHS Direct provided sites (27.9 – 33.7%). For all sites combined, over half of triaged calls were assessed as requiring primary or urgent care, that is, GP practice, GP out of hours, walk in centres, urgent care centres, minor injury units, dental service or pharmacist (Figure 1).

### Impact on emergency and urgent care services

Following the introduction of NHS 111, in individual pilot sites there was a statistically significant reduction in urgent care attendances in one site; reduction in calls to NHS Direct in three sites; reduction in ambulance emergency calls in one site and increase in one site, and an increase in ambulance incidents in one site.

For all sites combined, overall, there was no change in three of the five services measured that could be attributed to NHS 111 (Table 3). There was a large and statistically significant reduction in calls to NHS Direct of 102 fewer NHS Direct calls per triaged 1000 calls to NHS 111 equating to a 19.3% (95% CI -24.6% to 14.0%) reduction in monthly NHS Direct activity. There was also a small and statistically significant increase in numbers of ambulance incidents of an extra 24 ambulance incidents per 1000 triaged calls to NHS 111 equating to an increase of 2.9% (95% CI 1.0% to 4.8%) in monthly ambulance activity.

For all sites and services combined, monthly use of the established services in the system varied depending on the site but when NHS 111 use was added in, there was an increase in activity overall in every site and this increase, ranging from 4.7 -12% per month, remained with the assumption that NHS 111 will eventually take all NHS Direct calls and GP Out of Hours calls (Table 4).

## Discussion

### Summary of findings

In its first year of operation in pilot sites there was no evidence that NHS 111 changed use of most of the emergency and urgent care services it was possible to measure. There was a large reduction in use of NHS Direct as calls transferred to NHS 111 but an increase in numbers of emergency ambulances sent to patients.

### Context of other evidence

Policy makers in England established the first national telephone triage service in the world - NHS Direct - and there was considerable international interest in both this service and the evaluation of its pilot.[9] A Cochrane systematic review of the impact of telephone triage services identified that little research had been undertaken on the effect of these telephone services on emergency services.[10] The lack of impact of NHS 111 on emergency department attendances replicates the findings from the earlier evaluation of NHS Direct pilots.[11] The increase in ambulance incidents found in our study was not found for NHS Direct pilots. There is some evidence that telephone triage can reduce the use of general practice and general practice out of hours.[10, 11] A lack of routine data available for daytime general practice services in our study means we were unable to assess the impact of NHS 111 on use of general practice.

A key feature of NHS 111 is the use of non-clinical call handlers to assess calls. A systematic review of appropriateness of and compliance with telephone triage [12] found only two papers on non-clinical triageurs and these were of little relevance to NHS 111 as no assessment software was used.

### Strengths and limitations

This evaluation has three strengths. First, there is little research evidence about telephone triage services operated by non-clinical call handlers, and the impact of telephone triage services on use of the emergency and urgent care system, making this evaluation of NHS 111 a valuable addition to the evidence base. Second, the evaluation is timely given that NHS 111 was established in pilot status in 2010 and is being rolled out nationally in England during 2012/13. Third, it is a large controlled study that has included data from a population of 3.6million people over 36 months on the use of five services as well as NHS111. The evaluation has three limitations. First, there was considerable 'noise' in the analysis of impact on services in terms of changes made to the range of services in the emergency and urgent care system other than NHS 111 in both the pilot and control sites. We recorded 13 different system changes across the pilot and control sites including relocation of an emergency department, reconfiguration of walk in and urgent care centres and emergency department diversion schemes. This made it challenging to detect the effect of NHS 111 but the time series analysis was a sophisticated approach to deal with these difficulties. Second,

1  
2  
3 there was no routine data available for a key service that may have been impacted by NHS  
4 111: day time general practice, so the effects on this part of the system remain unknown.  
5 Finally, the timing of policy evaluations must be balanced to ensure early feedback to policy  
6 makers but also to allow for a service to become established. This evaluation is based on the  
7 first year of operation of a new service and so whilst early lessons are valuable the impact  
8 may change as the service matures and develops.  
9  
10

### 11 12 13 Implications

14  
15 The findings of this study raise four key questions for the development of a national service.  
16 First, the four NHS 111 pilots did not produce some of the key expected benefits in their first  
17 year of operation. In fact they increased use of emergency ambulance incidents when the  
18 benefit expected was a reduction in use of this service in the longer term. In 2011/12  
19 ambulance services in England attended 6.71 million incidents [13] and the 2.9% increase in  
20 ambulance incidents we have estimated could potentially result in an additional 195,000  
21 annual attendances nationally or about 14,500 extra attendances for an ambulance service  
22 attending 500,000 incidents per year. It is important to further investigate and understand  
23 how the assessment system triages calls to the ambulance service in order to avoid  
24 unnecessary use of emergency ambulances.  
25  
26  
27  
28

29  
30 Second, during our evaluation NHS Direct was still running as an alternative service. The  
31 policy plan is that NHS 111 will replace NHS Direct and there are significant implications to  
32 this strategy. NHS Direct was established to direct people to the right place but also in  
33 practice offers advice to people who do not need contact with a service. The emphasis of  
34 NHS 111 is on direction to right place rather than reassurance and self care advice. In our  
35 evaluation NHS 111 managed predominantly out of hours calls for urgent healthcare. If  
36 current callers to NHS Direct are shifted to NHS 111 the call volumes may increase  
37 substantially, the characteristics of the population using the service may change and  
38 consideration will need to be given to how the principles of NHS 111 in terms of immediate  
39 access without waiting, particularly for clinical advice, can be sustained.  
40  
41  
42  
43

44 Third, another important question to consider is whether the introduction of NHS 111 is  
45 creating supplier induced demand and therefore increasing overall demand for emergency  
46 and urgent care. There was some evidence from our system impact analysis that emergency  
47 and urgent care service use had increased overall but we cannot say if this is a real increase  
48 in demand or a shift from in hours GP services. It is possible that, once NHS 111 is a national  
49 service with a higher profile, demand for the service could change either by generating new  
50 demand or by people using it as an alternative to in hours primary care, or a combination of  
51 both.  
52  
53  
54

55 Finally, it is useful to reflect on the expectations of the service. The provision of a telephone  
56 service which quickly guides people needing urgent care advice to the most appropriate  
57 service is sensible given repeatedly expressed concerns by the general public about  
58  
59  
60

1  
2  
3 confusion around which service to access when needing urgent care. Key aspects of the  
4 service such as an easy-to-remember number, emphasis on fast triage and smooth transfer  
5 to the 'right service, first time' are desired by the general public. In our evaluation we found  
6 that alongside implementation of NHS 111 there were various re-organisations of  
7 services and implementation of demand management schemes in both the pilot and control  
8 sites. It is probably unrealistic to expect any one service, such as NHS 111, to do everything  
9 and real improvements may only be gained when a series of co-ordinated measures  
10 designed to increase efficiency across all services are implemented.  
11  
12  
13

## 14 References

- 15  
16  
17 1. Department of Health. Direction of Travel for Urgent Care.2006; [Online] Available at:  
18 [http://webarchive.nationalarchives.gov.uk/+www.dh.gov.uk/en/consultations/Liveconsultations/DH\\_4139428](http://webarchive.nationalarchives.gov.uk/+www.dh.gov.uk/en/consultations/Liveconsultations/DH_4139428)  
19  
20
- 21  
22 2. O'Cathain, A., Coleman, P., Nicholl, J.. Characteristics of the emergency and urgent care  
23 system important to patients: a qualitative study. *Journal of Health Services Research &*  
24 *Policy* 2008;2: 19-25.  
25
- 26  
27 3. Department of Health. .High Quality Care for All: NHS Next Stage Review final report.  
28 2008[Online] Available at:  
29 [http://www.dh.gov.uk/en/Publicationsandstatistics/Publications/PublicationsPolicyAndGuidance/DH\\_085825](http://www.dh.gov.uk/en/Publicationsandstatistics/Publications/PublicationsPolicyAndGuidance/DH_085825)  
30  
31
- 32  
33 4. NHS Connecting for Health. Introduction to NHS 111. 2011; [Online] Available at:  
34 <http://www.connectingforhealth.nhs.uk/systemsandservices/pathways/news/nhs111intro.pdf>  
35  
36
- 37  
38 5. NHS Connecting for Health. NHS Pathways care narrative. 2012; [Online] Available at:  
39 <http://www.connectingforhealth.nhs.uk/systemsandservices/pathways/comms/corenav.pdf>  
40  
41
- 42  
43 6. Department of Health. NHS 111 statistics. [Online] Available at:  
44 <http://transparency.dh.gov.uk/category/statistics/nhs-111-statistics>  
45
- 46  
47 7. Campbell MJ. Time Series Regression in Encyclopedia of Biostatistics. Edited by Peter  
48 Armitage and Theodore Colton. John Wiley & Sons, Ltd, Chichester, 1998. (ISBN 0471  
49 975761  
50
- 51  
52 8. StataCorp. 2011. Stata: Release 12. Statistical Software. College Station, TX: StataCorp LP.  
53
- 54  
55 9. Munro, J., Nicholl, J., O'Cathain, A., Knowles, E. et al, Evaluation of NHS Direct first wave  
56 sites. Final report of the phase I research. *Medical Care Research Unit*, 2001; University of  
57 Sheffield.  
58  
59  
60

1  
2  
3 10. Bunn, F., Byrne, G. and Kendall, S. The effects of telephone consultation and triage on  
4 healthcare use and patient satisfaction: a systematic review. *British Journal of General*  
5 *Practice* 2005; 55: 956-961.  
6

7  
8 11. Munro, J.F., Nicholl, J.P., O’Cathain, A. and Knowles, E. Impact of NHS Direct on demand  
9 for immediate care: observational study. *British Medical Journal* 2000; 321: 150-3.  
10

11 12. Blank L, Coster J, O’Cathain A, Knowles E, Tosh J, Turner J, Nicholl J. The appropriateness  
12 of, and compliance with, telephone triage decisions: a systematic review and narrative  
13 synthesis. *Journal of Advanced Nursing* 2012; 68(12): 2610-2621.  
14

15 13. NHS Information Centre. Ambulance Services – 2011/2012. NHS Information Centre  
16 2012;. [Online] Available at: [http://www.ic.nhs.uk/statistics-and-data-collections/audits-](http://www.ic.nhs.uk/statistics-and-data-collections/audits-and-performance/ambulance/ambulance-services--england-2011-12)  
17 [and-performance/ambulance/ambulance-services--england-2011-12](http://www.ic.nhs.uk/statistics-and-data-collections/audits-and-performance/ambulance/ambulance-services--england-2011-12)  
18  
19

20  
21  
22  
23  
24  
25 Data Sharing:

26 A dataset of aggregated monthly contact counts for 5 emergency and urgent care services in  
27 7 sites for 36 months is available on request from the corresponding author at  
28 [j.turner@sheffield.ac.uk](mailto:j.turner@sheffield.ac.uk)

29 The Department of Health publish monthly open access activity data for NHS 111 services  
30 available at <http://transparency.dh.gov.uk/category/statistics/nhs-111-statistics/>  
31  
32

33  
34 Acknowledgements:

35 We would like to thank: Professor Simon Dixon for advice about the economic analysis; Neil  
36 Shephard for statistical help with the system impact analysis and Dr Claire Ginn for  
37 obtaining the routine data used in the impact analysis.  
38

39  
40 Contributors:

41 JT and AOC conceived the study and designed it with help from JN and EK. JN conducted the  
42 system impact analysis. JT wrote the first draft of the paper. All authors assisted in the  
43 interpretation of data and revising the paper and approved the final draft. JT is the  
44 guarantor.  
45

46  
47 Funding:

48 The study was funded as an independent research project by the Policy Research  
49 Programme in the Department of Health. The Department of Health contributed to the  
50 development of the research questions to be addressed. The funders had no role in  
51 conducting the study, writing the paper or the decision to submit the paper for publication.  
52 The views expressed in this paper are not necessarily those of the Department of Health.  
53  
54

55 Ethics:

56 The study was approved by the Leeds (Central ) Research Ethics Committee Reference  
57 number 10/H1313/57. NIHR CRN study ID: 9275  
58  
59  
60

1  
2  
3 Competing interests:

4  
5 All authors have completed the Unified Competing Interest form at  
6 [www.icmje.org/coi\\_disclosure.pdf](http://www.icmje.org/coi_disclosure.pdf) (available on request from the corresponding author) and  
7 declare: the Department of Health Policy Research programme provided grant funding to  
8 the Medical Care Research Unit, University of Sheffield. AOC and JN are co-applicants on a  
9 research grant with NHS Direct studying tele-health for people with long term conditions. A  
10 family member of AOC won a contract to offer patient feedback for NHS 111 sites in London  
11 in June 2012.  
12  
13

14  
15  
16 The Corresponding Author has the right to grant on behalf of all authors and does grant on  
17 behalf of all authors, [a worldwide licence](#) to the Publishers and its licensees in perpetuity, in  
18 all forms, formats and media (whether known now or created in the future), to i) publish,  
19 reproduce, distribute, display and store the Contribution, ii) translate the Contribution into  
20 other languages, create adaptations, reprints, include within collections and create  
21 summaries, extracts and/or, abstracts of the Contribution, iii) create any other derivative  
22 work(s) based on the Contribution, iv) to exploit all subsidiary rights in the Contribution, v)  
23 the inclusion of electronic links from the Contribution to third party material where-ever it  
24 may be located; and, vi) licence any third party to do any or all of the above.  
25  
26  
27  
28  
29  
30  
31  
32  
33  
34  
35  
36  
37  
38  
39  
40  
41  
42  
43  
44  
45  
46  
47  
48  
49  
50  
51  
52  
53  
54  
55  
56  
57  
58  
59  
60

**Figure 1 – Percentage of triaged NHS 111 calls allocated to each emergency and urgent care service in four pilots sites in first year of operation**

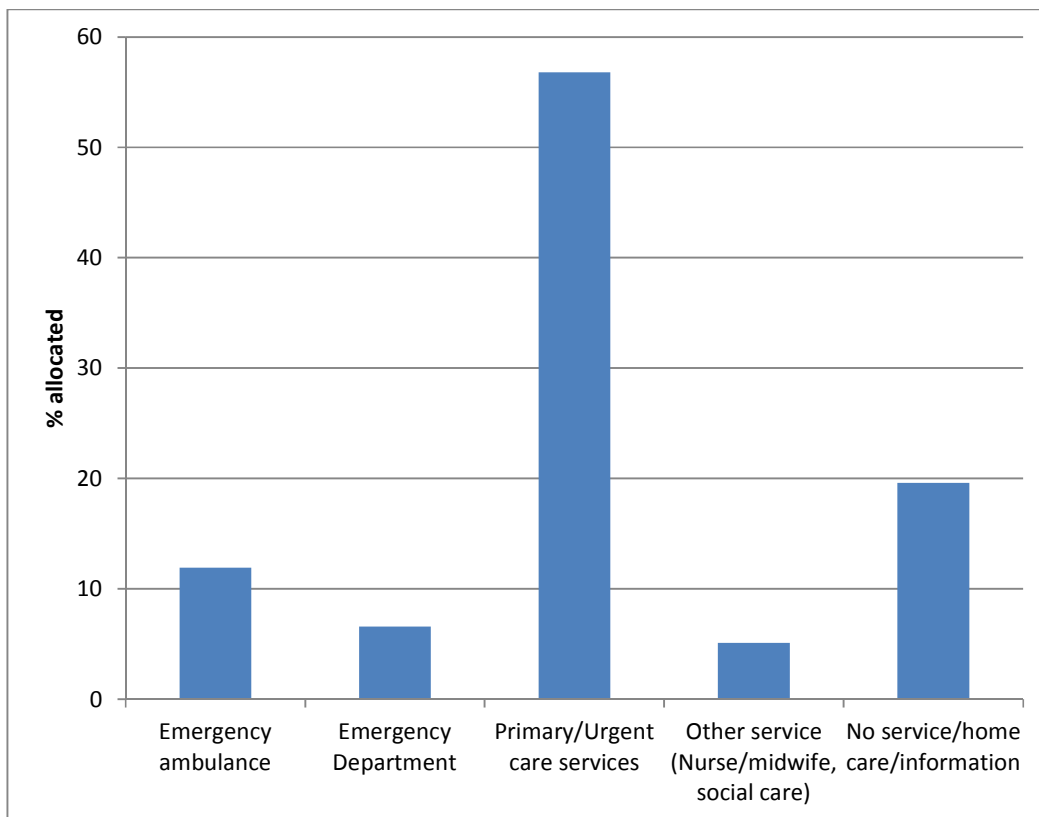

only

1  
2  
3  
4  
5  
6  
7  
8  
9  
10  
11  
12  
13  
14  
15  
16  
17  
18  
19  
20  
21  
22  
23  
24  
25  
26  
27  
28  
29  
30  
31  
32  
33  
34  
35  
36  
37  
38  
39  
40  
41  
42  
43  
44  
45  
46  
47  
48  
49

**Table 1: Demographic characteristics of pilot and control sites**

|                                                       | Pilot Sites                                |                       |                        |                           | Control Sites                                    |                        |                       |
|-------------------------------------------------------|--------------------------------------------|-----------------------|------------------------|---------------------------|--------------------------------------------------|------------------------|-----------------------|
|                                                       | Durham & Darlington                        | Nottingham            | Lincolnshire           | Luton                     | North of Tyne                                    | Norfolk                | Leicester City        |
| Population (000's)                                    | 620                                        | 305                   | 735                    | 700<br>(Northamptonshire) | 780                                              | 740                    | 280                   |
| SHA                                                   | North East                                 | East Midlands         | East Midlands          | East of England           | North East                                       | East of England        | East Midlands         |
| ONS Area Classification of Primary Care Organisations | Industrial Hinterlands                     | Centres with Industry | Prospering small towns | London Suburbs            | Industrial Hinterlands<br>Prospering small towns | Prospering small towns | Centres with Industry |
| ONS Rural/Urban Local Authority Classification        | Predominantly Urban<br>Predominantly Rural | Predominantly Urban   | Predominantly Rural    | Predominantly Urban       | Predominantly Urban<br>Predominantly Rural       | Predominantly Rural    | Predominantly Urban   |
| NHS 111 service live                                  | August 2010                                | November 2010         | November 2010          | December 2010             |                                                  |                        |                       |



**Table 2: Total numbers of NHS 111 calls received, answered, triaged and transferred for nurse assessment in one year**

|                                             | <b>Durham &amp; Darlington</b> | <b>Nottingham City</b> | <b>Lincolnshire</b> | <b>Luton</b>  | <b>All NHS 111 sites</b> |
|---------------------------------------------|--------------------------------|------------------------|---------------------|---------------|--------------------------|
| Population covered                          | 606,800                        | 300,800                | 700,300             | 194,300       | 1,802,200                |
| Total number of calls connected to 111      | 209,633                        | 58,397                 | 102,611             | 38,210        | 408,851                  |
| Direct dial 111 n (%)                       | 106,961 (51)                   | 18,354 (31.4)          | 102,611 (100)       | 23,264 (60.8) | 251,190 (61.4)           |
| Switched from other sources n (%)           | 102,672 (49)                   | 40,043 (68.6)          | 0                   | 14,946 (39.2) | 157,661 (38.6)           |
| Answerable calls n (%)                      | 165,355 (78.9)                 | 56,539 (96.8)          | 100,144 (97.6)      | 37,497 (98.1) | 359,535 (87.9)           |
| Answered calls n (% of answerable calls )   | 161,082 (97.4)                 | 55,564 (98.2)          | 99,381 (99.2)       | 37,073 (98.8) | 353,100 (98.2)           |
| Triaged calls n (% of answered calls)       | 114,686 (71.2)                 | 44,937 (80.9)          | 85,509 (86.0)       | 32,031 (86.4) | 277,163 (78.5)           |
| Transferred to nurse n (% of triaged calls) | 24,488 (21.3)                  | 13,261 (29.5)          | 28,871 (33.7)       | 10,779 (33.6) | 77,399 (27.9)            |
| Triaged calls per year per 1,000 people     | 189                            | 150                    | 122                 | 165           | 154                      |

**Table 3 Summary of estimated effects of NHS 111 on other emergency and urgent care services: % change in monthly activity counts**

| Service activity                        | Net change in raw activity*<br>Number (%) | Estimated change in monthly activity per 1000 triaged NHS 111 calls | Pilot v Control model – estimated % change in monthly activity (95%CI) |
|-----------------------------------------|-------------------------------------------|---------------------------------------------------------------------|------------------------------------------------------------------------|
| <b>ED attendances</b>                   | -1128 (-11)                               | -1 (-66, +64) fewer attendances                                     | -0.1% (-3.8%, +3.7%)                                                   |
| <b>GPOOH, WiC, UCC. MIU attendances</b> | -641 (-6)                                 | +47 (-66, +159) extra attendances                                   | +2.5% (-3.5%, +8.5%)                                                   |
| <b>Calls to NHS Direct</b>              | -312 (-10)                                | -102 (-130, -74) fewer calls                                        | -19.3% (-24.6%, -14.0%)                                                |
| <b>Calls to 999 ambulance service</b>   | -168 (-3)                                 | +3 (-31, +37) more calls                                            | +0.3% (-3.1%, +3.7)                                                    |
| <b>Ambulance 999 incidents</b>          | +114 (+2.5)                               | +24 (+8, +39) more incidents                                        | +2.9% (+1.0%, +4.8%)                                                   |

\*Net change is the change (before to after) in the pilot sites minus the change in the control sites.

**Table 4: Average monthly contacts (000s) with services in the emergency and urgent care system before and after the launch of NHS 111 (based on routine data)**

|                                                                                                  | Durham & Darlington | Change (%) | Nottingham | Change (%) | Luton  | Change (%) | Lincolnshire | Change (%) |       |       |       |       |
|--------------------------------------------------------------------------------------------------|---------------------|------------|------------|------------|--------|------------|--------------|------------|-------|-------|-------|-------|
|                                                                                                  | Before              | After      | Before     | After      | Before | After      | Before       | After      |       |       |       |       |
| EDs                                                                                              | 13675               | 13142      | -3.9       | 7505       | 7945   | +5.8       | 3474         | 3638       | +4.7  | 14293 | 14117 | -1.2  |
| Urgent                                                                                           | 13667               | 14729      | +7.7       | 8561       | 9424   | +11        | 7573         | 6135       | -19   | 12374 | 13222 | +6.8  |
| NHS Direct                                                                                       | 3978                | 2201       | -44.7      | 3016       | 2186   | -27.5      | 1547         | 1068       | -31   | 3660  | 2655  | -27.2 |
| Ambulance calls                                                                                  | 6479                | 6895       | +6.4       | 4824       | 5319   | +10.3      | 2626         | 2857       | +8.8  | 7307  | 8480  | +16.1 |
| Ambulance incidents                                                                              | 5304                | 5734       | +8.1       | 4276       | 4538   | +6.1       | 2239         | 2488       | +11.1 | 6989  | 7657  | +9.6  |
| All services                                                                                     | 43103               | 42701      | -1         | 28182      | 29412  | +4.2       | 17459        | 16186      | -7.3  | 44623 | 46131 | +3.3  |
| NHS 111                                                                                          | 0                   | 10000      |            | 0          | 3500   |            | 0            | 3000       |       | 0     | 10000 |       |
| Total with NHS 111                                                                               | 43103               | 52701      | +18.2      | 28182      | 32914  | +14.4      | 17459        | 19186      | +9.1  | 44623 | 56131 | +20.5 |
| Total assuming all NHS Direct calls taken by NHS 111                                             | 43103               | 50924      | +15.4      | 28182      | 32084  | +12.2      | 17459        | 18707      | +6.7  | 44623 | 55126 | +19   |
| Total assuming all NHS Direct calls taken by NHS 111 and estimated GP OOH calls taken by NHS 111 | 48003               | 50924      | +5.7       | 30582      | 32084  | +4.7       | 17459        | 18707      | +6.7  | 48523 | 55126 | +12   |

## **S1: NHS 111 service description**

### **Core service principles**

The underlying principle of NHS 111 is that patients who request urgent medical care should be assessed and directed to the “right service first time”. The main features of the service are that:

- The number is memorable and is free to use.
- Calls are assessed using an approved clinical assessment system to determine the most appropriate course of action for the patient at the first point of contact.
- Clinical assessment and provision of information, including clinician assessment, is completed on the first call without the need for a call back.
- Callers can be given health information, self care advice or directed to the most appropriate service available at the time of the call using an up to date skills based Directory of Services (DoS) for the patient’s local area and without the need for re-triage.
- Where possible the NHS 111 service should develop real time links with urgent care providers so that information can be forwarded and appointments can be made for callers at the time of their call to NHS 111.
- Calls assessed as requiring an emergency ambulance response can be immediately directed to ambulance dispatch without the need for re-assessment.

NHS 111 therefore provides an integrated service that links clinical assessment with the services that are appropriate and available at the time of the call.

## NHS 111 operational framework

Figure 4.1 illustrates the framework for the intended NHS 111 service during the initial pilot phase of the programme.

Figure 4.1 – Diagrammatic plan of the NHS 111 service

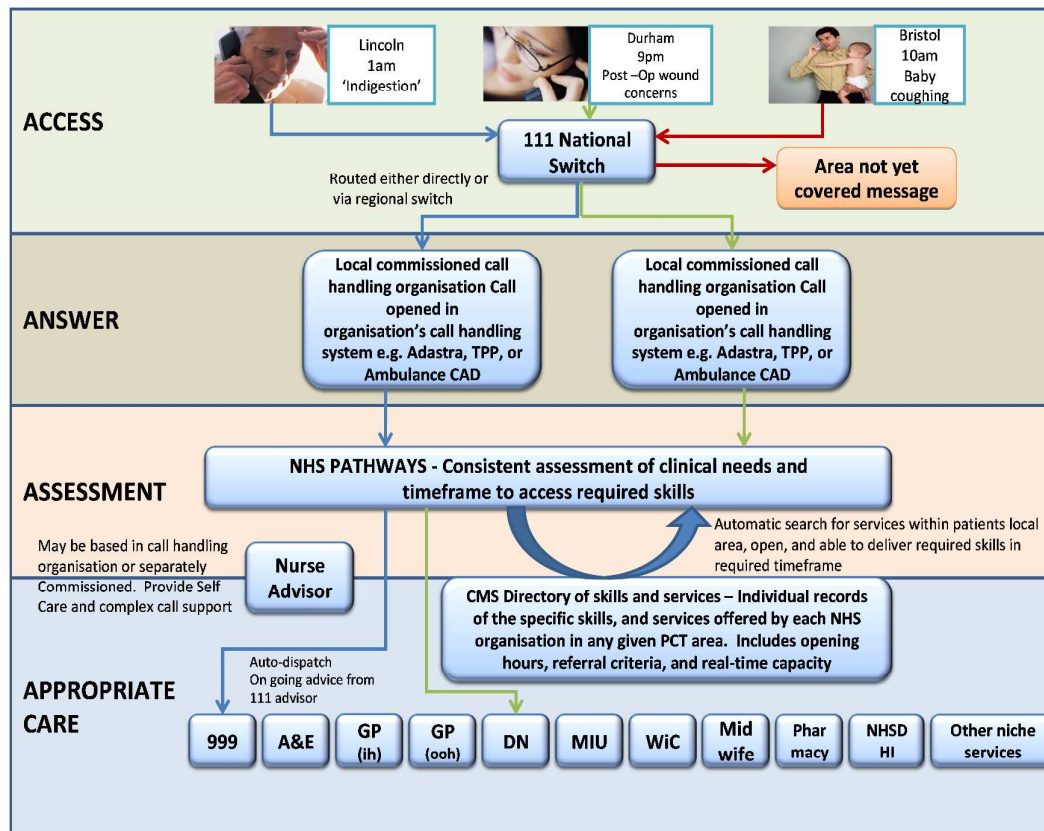

Source – NHS 111 Programme Board, 111 Service Specification version 1.2, May 2010

The operational framework consists of four linked steps:

1. *Access via the 111 telephone number* – Calls to NHS 111 can be routed in several ways and can be configured differently for different areas. The service can be accessed by callers only dialling 111, they may call another service such as a GP out of hours service and be asked to dial 111, or they may call another service and the call can be automatically switched to NHS 111 without the caller having to redial.
2. *Answer* – Calls are answered by a call handling service contracted to provide this service. The call handling service collects basic call details and then carries out the next step of clinical assessment.
3. *Clinical assessment* – In all four pilot sites a single clinical assessment system, NHS Pathways, is used as the clinical assessment system. NHS Pathways is a symptom based clinical assessment system used to triage calls from the public requesting emergency or

1  
2  
3 urgent healthcare and is used by ambulance services, GP out of hours services and other  
4 Single Point of Access telephone services for urgent care. The assessment is made by  
5 trained, non-clinical call advisors with clinician support available either on site. As call  
6 advisors ask symptom based questions, the answers to key indicator questions are flagged.  
7 The information from these answers is then used to match the clinical skills needed and the  
8 speed of response required for the clinical condition described to an appropriate service in  
9 step 4. In all sites most calls that may be suitable for self care advice or require referral to  
10 specialist services are transferred for clinical advice before a final disposition is reached.  
11  
12  
13

- 14  
15  
16 4. *A web based Capacity Management System and Directory of Skills & Services (CMS/DoS)* is  
17 linked to the NHS Pathways clinical assessment system. This directory is populated locally  
18 and jointly by service commissioners and provider services. The available skills of each  
19 provider are specified, as are service operation guidance such as location, referral protocols  
20 and opening times. Services are matched to the clinical indicator flags in the clinical  
21 assessment system and appear to the call advisor in the order set by the service  
22 commissioner. The Capacity Management System operates in real time, taking account of  
23 what is available and current activity. This enables a call for urgent care to be automatically  
24 matched to a service with the right skills, location and within the required timeframe at the  
25 time of the call without having to manually search for an appropriate service. Where adequate  
26 technical links can be set up, appointments or other contacts can be made by the call adviser  
27 at the time of the call. Any provider service can be included in the CMS/DoS but, to ensure  
28 clinical safety, only some will be available for referral by an NHS Pathways call advisor. Other  
29 services, for example specialist nursing services, require additional clinician assessment  
30 before a referral can be made. The CMS/DoS system also provides activity and referral data  
31 for service monitoring and planning.  
32  
33  
34  
35  
36  
37  
38

39 These four steps provide the overall framework for an NHS 111 service but within each step there are  
40 choices that can be made about how the service is delivered at a local level. Table 1 summarises the  
41 operating models used in the four pilot sites and illustrates the different approaches used.  
42  
43  
44  
45  
46  
47  
48  
49  
50  
51  
52  
53  
54  
55  
56  
57  
58  
59  
60

**Table 1: Description of four pilot site NHS 111 service models**

|                     | CDD                                                                                                                                                                                                                                                                                                                           | Nottingham                                                                                                                                                                                                                                                                  | Lincolnshire                                                                                                                                                                                                                                                                | Luton                                                                                                                                                                                                                                                                                                                                        |
|---------------------|-------------------------------------------------------------------------------------------------------------------------------------------------------------------------------------------------------------------------------------------------------------------------------------------------------------------------------|-----------------------------------------------------------------------------------------------------------------------------------------------------------------------------------------------------------------------------------------------------------------------------|-----------------------------------------------------------------------------------------------------------------------------------------------------------------------------------------------------------------------------------------------------------------------------|----------------------------------------------------------------------------------------------------------------------------------------------------------------------------------------------------------------------------------------------------------------------------------------------------------------------------------------------|
| Call routing        | <p>Direct dial 111</p> <p>Auto routed to 111 from Single Point of Access number</p>                                                                                                                                                                                                                                           | <p>Direct dial 111</p> <p>Auto routed to 111 from GP out of hours numbers</p>                                                                                                                                                                                               | <p>Direct dial 111 only (Nov 2010 – Mar 2011)</p> <p>All calls are 111 – no auto routed calls</p> <p>1<sup>st</sup> April 2011 onwards all GP out of hours calls given message to call 111</p>                                                                              | <p>Direct dial 111</p> <p>Auto routed to 111 from some GP out of hours numbers</p> <p>Other GP out of hours numbers have a message telling caller to call 111</p>                                                                                                                                                                            |
| Call answering      | <p>Call handling provided by North East Ambulance Service Foundation Trust</p> <p>Service provided from ambulance emergency control centre in Newcastle on Tyne utilising emergency call control centre in hours and Patient Transport Service control centre at peak NHS 111 call times.</p>                                 | <p>Call handling provided by NHS Direct national system</p> <p>Calls routed to NHS Direct using a separate number and identified within the system as Nottingham 111 or Nottingham OOH</p>                                                                                  | <p>Call handling provided by NHS Direct national system</p> <p>Calls routed to NHS Direct using a separate number and identified within the system as Lincolnshire 111</p>                                                                                                  | <p>Call handling provided by NHS Direct national system</p> <p>Calls routed to NHS Direct using a separate number and identified within the system as Luton 111</p>                                                                                                                                                                          |
| Clinical Assessment | <p>NHS Pathways using trained call advisors and on site nurse or paramedic clinical advice and supervision.</p>                                                                                                                                                                                                               | <p>NHS Pathways using trained call advisors and NHS Direct nurse advisors for clinical advice and supervision.</p>                                                                                                                                                          | <p>NHS Pathways using trained call advisors and NHS Direct nurse advisors for clinical advice and supervision.</p>                                                                                                                                                          | <p>NHS Pathways using trained call advisors and NHS Direct nurse advisors for clinical advice and supervision.</p>                                                                                                                                                                                                                           |
| CMS/DoS             | <p>Initial directory was existing directory and populated with services identified from commissioner led workshops and review meetings. Directory reflected urgent care reform and service remodelling that occurred prior to NHS 111. Current directory population built on this and led by PCT commissioner and a local</p> | <p>Two versions of directory have been populated. Initially populated by PCT leads who interacted with local providers. Second version using national clinical content templates was overseen by steering group with engagement with leads from provider organisations.</p> | <p>Two versions of directory have been populated. Initially populated by PCT leads who interacted with local providers. Second version using national clinical content templates was overseen by steering group with engagement with leads from provider organisations.</p> | <p>Population of directory has been a stepped process. Early phase contained primary care, urgent care and Out of Hours providers.</p> <p>Two additional re-populations and re-profiling edits in 2011 using national templates with additional services e.g. mental health, community services, social care added. Local engagement and</p> |

|                                   |                                                                                                                                                                                                                                                                                                                                            |                                                                                                                                                                                                                                                                                                                                                  |                                                                                                                                                                                                                                                                                                                                                  |                                                                                                                                                                                                                                                                                                                                                   |
|-----------------------------------|--------------------------------------------------------------------------------------------------------------------------------------------------------------------------------------------------------------------------------------------------------------------------------------------------------------------------------------------|--------------------------------------------------------------------------------------------------------------------------------------------------------------------------------------------------------------------------------------------------------------------------------------------------------------------------------------------------|--------------------------------------------------------------------------------------------------------------------------------------------------------------------------------------------------------------------------------------------------------------------------------------------------------------------------------------------------|---------------------------------------------------------------------------------------------------------------------------------------------------------------------------------------------------------------------------------------------------------------------------------------------------------------------------------------------------|
|                                   | <p>provider capacity manager. Engagement events held with primary care providers to agree arrangements for in hours care. Over time additional services have been added allowing referrals to e.g. district nurses, nurse specialists.</p> <p>Transport can also be arranged for eligible patients to attend appointments made by 111.</p> |                                                                                                                                                                                                                                                                                                                                                  |                                                                                                                                                                                                                                                                                                                                                  | <p>involvement has increased with each review.</p> <p>Another re-population planned for 2012.</p>                                                                                                                                                                                                                                                 |
| Technical links for warm transfer | <p>Ambulance service emergency system for immediate ambulance dispatch</p> <p>Urgent Care Services so appointments can be made by the NHS 111 call advisor while the caller is still on the telephone</p>                                                                                                                                  | <p>Ambulance service emergency system for immediate ambulance dispatch</p> <p>Calls can be warm transferred (i.e. no call back) to OOH provider for appointment booking</p>                                                                                                                                                                      | <p>Ambulance service emergency system for immediate ambulance dispatch</p> <p>Calls can be warm transferred (i.e. no call back) to OOH provider for appointment booking</p>                                                                                                                                                                      | <p>Manual dispatch of ambulances using agreed protocol</p> <p>Calls can be warm transferred (i.e. no call back) to booking agents within NHS Direct who book Out of Hours appointments with primary care services</p>                                                                                                                             |
| Training                          | <p>New staff recruited</p> <p>Standard NHS Pathways training. Additional training on safeguarding, negotiation skills, NHS 111 values, unscheduled care system. NHS 111 co-located with emergency ambulance control and both use NHS Pathways so call handlers can be used flexibly for either service when high demand.</p>               | <p>Existing NHS Direct call handling staff re-trained</p> <p>Standard NHS Pathways training. Extension of role as now assessing patient on initial call. Additional training on transfer processes for OOH and ambulance dispatch. Safeguarding, record keeping and communication skills training already included in call handler training.</p> | <p>Existing NHS Direct call handling staff re-trained</p> <p>Standard NHS Pathways training. Extension of role as now assessing patient on initial call. Additional training on transfer processes for OOH and ambulance dispatch. Safeguarding, record keeping and communication skills training already included in call handler training.</p> | <p>Existing NHS Direct call handling staff re-trained</p> <p>Standard NHS Pathways training. Extension of role as now assessing patient on initial call.. Additional training on transfer processes for OOH and ambulance dispatch. Safeguarding, record keeping and communication skills training already included in call handler training.</p> |
| Public Launch                     | August 2010                                                                                                                                                                                                                                                                                                                                | November 2010                                                                                                                                                                                                                                                                                                                                    | November 2010                                                                                                                                                                                                                                                                                                                                    | December 2010                                                                                                                                                                                                                                                                                                                                     |



## S2: Criteria used to identify suitable control sites

| Indicator                                | Description                                                                                                                                   | Data source                                                                                                 |
|------------------------------------------|-----------------------------------------------------------------------------------------------------------------------------------------------|-------------------------------------------------------------------------------------------------------------|
| <b>Demographics</b>                      |                                                                                                                                               |                                                                                                             |
| Population size                          | Target population (thousands)                                                                                                                 | PCT publications                                                                                            |
| Persons 65+                              | Proportion of people 65 and over (%)                                                                                                          | Office of National Statistics (2008 estimates)                                                              |
| Ethnicity                                | Proportion of BME population (%)                                                                                                              | Office of National Statistics (2007 data)                                                                   |
| Life expectancy                          | Life expectancy at birth for males/females (years)                                                                                            | The NHS Information Centre, Compendium of Clinical and Health Indicators (2006-2008 data)                   |
| Deprivation value                        | Proportion of people living in 20% most deprived areas of England (%)                                                                         | The Association of Public Health Observatories (2007 data)                                                  |
| <b>Lifestyle</b>                         |                                                                                                                                               |                                                                                                             |
| Alcohol                                  | Proportion of binge drinking adults (%)                                                                                                       | The NHS Information Centre, Health surveys for England 2003-2005                                            |
| Smoking                                  | Proportion of smoking adults (%)                                                                                                              |                                                                                                             |
| Obesity (adults)                         | Proportion of obese adults (%)                                                                                                                |                                                                                                             |
| Obesity (children)                       | Proportion of obese year 6 children (%)                                                                                                       | The NHS Information Centre, National Child Measurement Programme: England, 2008/09 school year              |
| <b>Health profile</b>                    |                                                                                                                                               |                                                                                                             |
| Mortality rate, all causes               | Directly age-standardised rate per 100000 population under 75                                                                                 | The NHS Information Centre, Compendium of Clinical and Health Indicators (2006-2008 data)                   |
| Mortality rate, all cancers              | Directly age-standardised rate per 100000 population under 75                                                                                 |                                                                                                             |
| Mortality rate, all circulatory diseases | Directly age-standardised rate per 100000 population under 75                                                                                 |                                                                                                             |
| People with limiting long-term illness   | Proportion of people with limiting long-term illness, 2001 Census                                                                             | Office of National Statistics (2001 Census data)                                                            |
| People with long-term conditions         | Proportion of respondents who reported a long-standing health problem in GP Patient Survey (%)                                                | GP Patient Survey 2008/09                                                                                   |
| <b>Use of health services</b>            |                                                                                                                                               |                                                                                                             |
| A&E attendances                          | Attendance rate per 1000 population, includes A&E Departments, Walk in Centres and Minor Injury Units                                         | Department of Health, QMAE data 2007/08                                                                     |
| GP consultations                         | General Practices consultations combined rate per 1000 population (include GP and practice nurse consultations, estimates from national data) | The NHS Information Centre, QResearch report on trends in consultation rates in General Practices 1995-2008 |
| GP out of hours contacts                 | Proportion of respondents of the GP Patient Survey who tried to contact OOH GP service in the last 6 months (%)                               | GP Patient Survey 2008/09                                                                                   |
| NHS Direct calls                         | Call rate per 1000 population                                                                                                                 | NHS Direct, 2008/09 data                                                                                    |

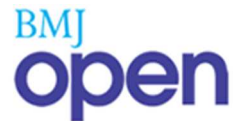

**Impact of the urgent care telephone service NHS 111 pilot sites: a controlled before and after study**

|                                 |                                                                                                                                                                                                                                                                                                                                                                                                         |
|---------------------------------|---------------------------------------------------------------------------------------------------------------------------------------------------------------------------------------------------------------------------------------------------------------------------------------------------------------------------------------------------------------------------------------------------------|
| Journal:                        | <i>BMJ Open</i>                                                                                                                                                                                                                                                                                                                                                                                         |
| Manuscript ID:                  | bmjopen-2013-003451.R1                                                                                                                                                                                                                                                                                                                                                                                  |
| Article Type:                   | Research                                                                                                                                                                                                                                                                                                                                                                                                |
| Date Submitted by the Author:   | 23-Aug-2013                                                                                                                                                                                                                                                                                                                                                                                             |
| Complete List of Authors:       | Turner, Janette; University of Sheffield, ScHARR<br>O'Cathain, Alicia; The University of Sheffield, School of Health and Related Research (ScHARR)<br>Knowles, Emma; The University of Sheffield, School of Health and Related Research (ScHARR)<br>Nicholl, Jonathan; University of Sheffield, Medical Care Research Unit; The University of Sheffield, School of Health and Related Research (ScHARR) |
| <b>Primary Subject Heading</b>: | Emergency medicine                                                                                                                                                                                                                                                                                                                                                                                      |
| Secondary Subject Heading:      | Health policy, Health services research                                                                                                                                                                                                                                                                                                                                                                 |
| Keywords:                       | ACCIDENT & EMERGENCY MEDICINE, Health policy < HEALTH SERVICES ADMINISTRATION & MANAGEMENT, Organisation of health services < HEALTH SERVICES ADMINISTRATION & MANAGEMENT, Information technology < BIOTECHNOLOGY & BIOINFORMATICS                                                                                                                                                                      |
|                                 |                                                                                                                                                                                                                                                                                                                                                                                                         |

SCHOLARONE™  
Manuscripts

Only

**Impact of the urgent care telephone service NHS 111 pilot sites: a controlled before and after study**

J Turner

Senior Research Fellow, Medical Care Research Unit, ScHARR, University of Sheffield, Regent Court, 30 Regent Street, Sheffield S1 4DA

A O’Cathain

Professor of Health Services Research, Medical Care Research Unit, ScHARR, University of Sheffield, Regent Court, 30 Regent Street, Sheffield S1 4DA

E Knowles

Research Fellow, Medical Care Research Unit, ScHARR, University of Sheffield, Regent Court, 30 Regent Street, Sheffield S1 4DA

J Nicholl

Dean, Medical Care Research Unit, ScHARR, University of Sheffield, Regent Court, 30 Regent Street, Sheffield S1 4DA

Corresponding author: [j.turner@sheffield.ac.uk](mailto:j.turner@sheffield.ac.uk)

Medical Care Research Unit, ScHARR, University of Sheffield, Regent Court, 30 Regent Street, Sheffield S1 4DA

## Abstract

**Objectives:** To measure the impact of the urgent care telephone service NHS 111 on the emergency and urgent care system.

**Design:** Controlled before and after study using routine data.

**Setting:** Four pilot sites and three control sites covering a total population of 3.6million in England, UK.

**Participants and data:** Routine data on 36 months of use of emergency ambulance service calls and incidents, emergency department attendances, urgent care contacts (GP out of hours, walk in and urgent care centres) and calls to the telephone triage service NHS Direct.

**Intervention:** NHS 111, a new 24 hour 7 day a week telephone service for non-emergency health problems, operated by trained non-clinical call handlers with clinical support from nurse advisors, using NHS Pathways software to triage calls to different services and home care.

**Main outcomes:** Changes in use of emergency and urgent care services.

**Results:** NHS 111 triaged 277,163 calls in the first year of operation for a population of 1.8 million. There was no change overall in emergency ambulance calls, emergency department attendances or urgent care use. There was a 19.3% reduction in calls to NHS Direct (95%CI -24.6% to14.0%) and a 2.9% increase in emergency ambulance incidents (95%CI 1.0% to 4.8%). There was an increase in activity overall in the emergency and urgent care system in each site ranging from 4.7 -12% per month and this remained when assuming that NHS 111 will eventually take all NHS Direct and GP Out of Hours calls.

**Conclusions:** In its first year of operation in four pilot sites NHS 111 did not deliver the expected system benefits of reducing calls to the 999 ambulance service or shifting patients to urgent rather than emergency care. There is potential that this type of service increases overall demand for urgent care.

## Article Summary

### Article Focus

- NHS 111 is a new telephone service for accessing urgent care where calls are assessed by non-clinical call handlers with clinician support.
- The aim of the service is to direct callers to the “right place, first time” and improve emergency and urgent care system efficiency.
- We have evaluated the first year of operation in four pilot sites to assess whether the new service achieves the objective of improving system efficiency.

### Key messages

- In the first year of operation 72% of triaged calls to NHS 111 were managed by non-clinical call handlers and the service met quality standards.
- NHS 111 did not achieve the objective of increasing emergency and urgent care system efficiency. There was a significant increase in emergency ambulance incidents and an overall increase in use of emergency and urgent care services.

### Strengths and limitations

- This is the first controlled evaluation of the impact of the NHS 111 service on the emergency and urgent care system in England. This is timely as the service is being rolled out nationally.
- There is limited evidence on the use of non-clinical call handlers to triage requests for urgent care and this study adds to the evidence base.
- Although we conducted a controlled study other system changes made it difficult to isolate the effects of NHS 111 and we were unable to assess the potential impact on in hours GP services.

## **Introduction**

A consultation by policy makers in England identified that a key frustration in the general population was access to urgent care.[1] Urgent care is defined as “the range of responses to people who require or perceive they need for urgent advice, care, treatment or diagnosis”. [1] Problems faced by users of emergency and urgent care included a lack of awareness of services available, confusion about which service to access and multiple service contacts for the same episode.[2] In England in 2000 a national 24 hour telephone line for advice about health problems, NHS Direct, was established to address similar frustrations. Calls are answered by a non-clinical call handler and assessed by a nurse either immediately or with a later call back. Despite this service the national consultation found that access problems persisted.[1]

NHS 111 was developed as a solution to these problems by offering a telephone service to manage all requests for urgent help[3] including requests for out of hours primary care, urgent problems that may currently be directed to 999 ambulance services and health information and advice. The key differences from NHS Direct are - access via a free to call, easily remembered three digit telephone number ‘111’; calls answered and assessed immediately by a trained non-clinical call handler without waiting or call backs; only some calls assessed by a nurse; and integration of the assessment system with services enabling direct referral to, or appointments to be made with, some services at the time of the call.

The expected benefits of NHS 111 were to improve access to urgent care, increase efficiency by directing people to the ‘right place first time’ including self care advice, increase satisfaction with urgent care and the national health service (NHS) generally, and in the longer term reduce unnecessary calls to the 999 emergency ambulance service and so begin to rectify concerns about inappropriate use of emergency services.[4]

NHS 111 was established in four pilot sites in England in 2010. It is rapidly becoming available nationally and there is international interest in telephone access to urgent care via non-clinical triage. A mixed methods evaluation focusing on processes, outcomes and costs was conducted in the four pilot sites. We report here on the specific outcome of NHS 111 improving efficiency of service use across the emergency and urgent care system by shifting care from emergency to urgent services. The objective was to assess the impact of NHS 111 on the emergency and urgent care system by examining demand for other urgent and emergency care services to detect if there was any change in how services were used.

## **Methods**

### **Setting and service**

Pilot services were established in four geographical areas defined by primary care trusts, the health care commissioning organisations operating in England in 2010. Durham & Darlington

1  
2  
3 is an urban area with a population of around 606,000; Nottingham is a city of around  
4 300,000 with a large minority ethnic population; Luton is a city of around 200,000 with a  
5 large minority ethnic population; and Lincolnshire is a largely rural area with a city, of  
6 population 700,000. The four sites were chosen by the English Department of Health  
7 following a request for expressions of interest from commissioning organisations already  
8 planning or considering changing telephone access to urgent care. Call handling was  
9 provided by an ambulance service in one site and NHS Direct in three sites. In all sites NHS  
10 111 could be accessed directly by dialling "111" or indirectly where GP out of hours call  
11 handling services were routed to NHS 111. Calls to NHS 111 are answered and assessed by  
12 trained non-clinical call handlers using the NHS Pathways assessment system.[5] If needed,  
13 calls can be transferred for additional assessment and advice from an onsite trained nurse.  
14 At the end of the assessment callers are matched to the most appropriate service available  
15 at the time of their call from a range of services within the callers' locality using an  
16 electronic Directory of Services linked to the assessment system. This can include  
17 emergency ambulance, emergency department, urgent care centre, walk in centre, minor  
18 injury unit, general practice (GP) out of hours service, in hours GP, community services, or  
19 home care. Referrals can be made to some services by NHS 111 at the time of the call, for  
20 example, direct dispatch of an emergency ambulance, appointment booking and transfer of  
21 the call to another telephone based service. A description of the NHS 111 service is  
22 provided as a supplemental file [S1]. **Design**

23  
24  
25  
26  
27  
28  
29  
30  
31 The design of this part of the evaluation was a descriptive study of NHS 111 service use and  
32 a controlled before and after study using a time series analysis of routine service activity  
33 data. Control sites were selected to match equivalent geographical areas to the pilot sites  
34 using a two stage process: 1) potential sites were identified by primary care trust area type  
35 (county or city), urban/rural mix and same Strategic Health Authority (SHA) or nearest  
36 neighbour; 2) from 12 potential sites the final choice was made after matching for a range of  
37 18 criteria based on population demographics, lifestyle, health profile and health service  
38 use. A table listing all criteria is provided as a supplemental file [S2]. It was important that  
39 control sites had no plans to introduce NHS 111 or make major changes to their emergency  
40 and urgent care system in the time frame of the evaluation. We identified three suitable  
41 control sites: North of Tyne, Leicester and Norfolk. Leicester was the best match for two  
42 pilot sites (Nottingham and Luton). The control site for Luton is not in the same SHA but was  
43 the best match for all other criteria and was the only suitable nearest neighbour SHA. For  
44 the main impact analysis sites have been combined to provide single pilot and control sites.  
45 The characteristics of the pilot and control sites are presented in Table 1. For the analyses  
46 reported here data from all pilot sites were combined and compared with data from all  
47 control sites. Randomisation of sites to be pilots or controls was not possible because the  
48 four pilot sites were pre-selected by the Department of Health.

49  
50  
51  
52  
53  
54  
55  
56 The four pilot sites became fully operational at different times from July to December 2010.  
57 The study periods used were the first full year of operation of NHS 111 and the  
58  
59  
60

1  
2  
3 corresponding 2 years prior to the service starting. During the course of the evaluation NHS  
4 Direct continued to operate as a national service within the pilot site areas.  
5  
6

### 7 **Participants**

8  
9 Participants were users of the emergency and urgent care systems in the seven pilot and  
10 control sites recorded in routine service activity data as having accessed and used a range of  
11 emergency or urgent care services during the study periods.  
12

### 13 **Data collection**

#### 14 Use of NHS 111

15  
16  
17 A minimum data set (MDS) was created by the English Department of Health to provide  
18 information on NHS 111 service operation. All NHS 111 services submit monthly data and a  
19 MDS of activity for combined and individual services is published each month by the  
20 Department of Health.[6] The MDS records activity include numbers of: calls to the service;  
21 abandoned calls; triaged calls and transfer times for calls requiring clinical advice from a  
22 nurse. The dispositions of NHS 111 calls are recorded in five main categories: 1) ambulance  
23 dispatches; 2) recommended to attend Emergency Department; 3) recommended to attend  
24 primary and community care (including GP, urgent care, dental and pharmacy services); 4)  
25 recommended to attend another service (including community nursing, midwives, social  
26 services, opticians); 5) not recommended to attend a service (including home or self care  
27 and health information). We used the monthly routine minimum data set counts for each  
28 pilot site for the first year of operation to describe call volumes, numbers and proportions of  
29 triaged calls and calls passed for nurse assessment and the disposition arrived at following  
30 NHS Pathways assessment.  
31  
32  
33  
34  
35  
36

#### 37 Routine data on use of key services

38  
39 NHS 111 had the potential to produce an impact on activity across a range of emergency  
40 and urgent care services: calls to the emergency ambulance service; ambulance incidents,  
41 that is, an ambulance is sent and arrives at the scene of the emergency incident; emergency  
42 department (ED) attendances; contacts with urgent care services such as GP out of hours,  
43 urgent care centres, walk in centres or minor injury units; the telephone triage service NHS  
44 Direct; same day general practice attendances; and a range of community services such as  
45 district nursing, dentists and pharmacies. Data are routinely available for calls and incidents,  
46 ED, urgent care and NHS Direct) by residents in the seven geographical areas – four pilot and  
47 three control sites - for 24 months prior to the start of NHS 111 (2008-10) and the same  
48 data plus calls to NHS 111 in the pilot areas for 12 months after (2010-11). Due to a lack of  
49 data availability for separate urgent care services, we had to combine data for out of hours  
50 primary care contacts, walk in centre attendances and urgent care centre attendances. The  
51 sources of this data were NHS data collections (Secondary Users Service and Weekly  
52 Situation reports) and local management information reports provided by the study sites. .  
53  
54  
55  
56  
57  
58  
59  
60



1  
2  
3 For local management information reports a set of data items and definitions was used to  
4 standardise data collection across all sites. In one pilot area data on one urgent care contact  
5 data item was missing and therefore inputted from the previous and subsequent 3 months  
6 activity. All data was collected and collated by the Department of Health Commissioning  
7 Analysis and Intelligence Team  
8  
9

10  
11 We also needed to account for changes to services in the emergency and urgent care  
12 system other than NHS 111 occurring in the 36 months. NHS 111 leads and control site  
13 evaluation contacts were asked to provide details of changes to emergency and urgent care  
14 services occurring in study sites during the study time periods. We also searched primary  
15 care trust annual reports for 2009/10 and 2010/11 for each study site to identify any  
16 reported major changes to the emergency and urgent care system.  
17  
18  
19

## 20 21 **Analysis**

22  
23 For the service use analysis we fitted a time series regression model [7] to the combined  
24 pilot site counts to test for preliminary evidence that service use had changed over time.  
25 This model consisted of a month effect to help explain variation due to seasonal  
26 fluctuations, an overall trend, a before and after step term for other potentially significant  
27 changes introduced into the pilot site, and a term for before and after the time when NHS  
28 111 was launched. This was the pilot only model.  
29  
30

31 We then tested for changes in the pilot sites compared to the control sites using time series  
32 regression to test for the impact of NHS 111. We used a simple model with three main  
33 elements: 1) The basic model, consisting of a linear trend in activity over the 36 months  
34 constrained to be the same in the pilot and control sites, plus a seasonal effect and a site  
35 effect. 2) Site specific before and after terms to allow for effects of potentially significant  
36 service changes other than NHS 111 introduced during the 36 months e.g. relocation of an  
37 emergency department. 3) A term for the regression of the monthly activity counts on the  
38 volume of NHS 111 calls that were triaged that month (the 'dose'). By definition the dose is  
39 zero for all months in the control sites and up until the launch of NHS 111 in the pilot sites.  
40 This regression allowed us to directly estimate the impact of different levels of NHS 111  
41 activity.  
42  
43  
44

45 We used the regression coefficient to estimate the impact on monthly service use per  
46 thousand NHS 111 calls for the pilot sites. The models were fitted and coefficients and  
47 standard errors estimated assuming normal errors with constant variance in the monthly  
48 activity counts. To check the assumption of constant variance, we also fitted models to the  
49 square root of the counts which helps stabilise the variance. This produced no important  
50 differences in fit so results using the raw count models are reported here as the pilot versus  
51 control model. We used the Prais-Winsten procedure in STATA version 12 to fit the time  
52 series regression models.[8]We considered the potential impact of NHS 111 on overall  
53 demand for the emergency and urgent care system as this adds an extra service and can  
54 potentially add an extra contact if it does not reduce use of other services in the system. We  
55  
56  
57  
58  
59  
60

1  
2  
3 used the routine data to measure monthly use of the different services in each pilot site  
4 before and after the introduction of NHS 111 and hence overall use of the emergency and  
5 urgent care system. We have then estimated the effect on the system taking two additional  
6 factors in to account 1) in the “after” period NHS Direct and NHS 111 were operating  
7 concurrently so we have estimated the effect if all NHS Direct calls are taken by NHS 111  
8 and 2) in the “before” period GP out of hours calls (rather than contacts) were taken by a  
9 number of providers so we have estimated the number of these calls using the routine NHS  
10 111 data on calls diverted from out of hours providers. The assumption of all NHS Direct and  
11 out of hours calls being managed by NHS 111 reflects the intended national service.  
12  
13  
14  
15  
16  
17  
18  
19  
20  
21  
22

## 23 **Results**

### 24 Use of NHS 111

25  
26  
27 In the first year of operation over 400,000 calls were made to NHS 111 (Table 2). Two thirds  
28 were direct dial of the telephone number ‘111’ by members of the general public and the  
29 other third were routed to the service from GP out of hours services. 22% of calls were  
30 unanswerable because the caller hung up within 30 seconds. These calls were  
31 predominately not intended for NHS 111 but were from people calling their general practice  
32 in the morning to make an appointment with their GP before the out of hours rerouting  
33 mechanism was switched off. 98% of answerable calls were answered and 277,163 (78%) of  
34 these were triaged by a call handler using the NHS Pathways assessment system. Reasons  
35 for not triaging calls were that the caller hung up, the call was transferred without triage  
36 (for example for a 999 ambulance), or health information only was given. The annual rate of  
37 triaged calls per 1000 population was 154. All pilot sites met national quality requirements  
38 for call abandonment rates of no more than 5%, and 95% of calls answered within 60  
39 seconds. 28% of calls were transferred to a nurse for clinical advice although transfers were  
40 lower in the ambulance service provided site (21.3%) than in the NHS Direct provided sites  
41 (27.9 – 33.7%). For all sites combined, over half of triaged calls were assessed as requiring  
42 primary or urgent care, that is, GP practice, GP out of hours, walk in centres, urgent care  
43 centres, minor injury units, dental service or pharmacist (Figure 1).  
44  
45  
46  
47  
48  
49  
50  
51  
52

### 53 Impact on emergency and urgent care services

54  
55  
56 Across all pilot and control sites there were 13 other system changes reported that were  
57 taken in to account in the analysis including the opening, closing and relocation of urgent  
58  
59  
60

1  
2  
3 care and walk in centres, relocation of an emergency department, ED attendance reduction  
4 schemes, ambulance service conveyance direct to walk in centres and related publicity  
5 campaigns.  
6

7 Following the introduction of NHS 111, in individual pilot sites there was a statistically  
8 significant reduction in urgent care attendances in one site; reduction in calls to NHS Direct  
9 in three sites; reduction in ambulance emergency calls in one site and increase in one site,  
10 and an increase in ambulance incidents in one site.  
11

12 For all sites combined, overall, there was no change in three of the five services measured  
13 that could be attributed to NHS 111 (Table 3). There was a large and statistically significant  
14 reduction in calls to NHS Direct of 102 fewer NHS Direct calls per triaged 1000 calls to NHS  
15 111 equating to a 19.3% (95% CI -24.6% to 14.0%) reduction in monthly NHS Direct activity.  
16 There was also a small and statistically significant increase in numbers of ambulance  
17 incidents of an extra 24 ambulance incidents per 1000 triaged calls to NHS 111 equating to  
18 an increase of 2.9% (95% CI 1.0% to 4.8%) in monthly ambulance activity.  
19  
20  
21  
22

23 The counts of contacts with all services in the pilot sites shows that monthly use of the  
24 established services in the system slightly increased or slightly decreased, depending on the  
25 site but when NHS 111 use was added in, there was an increase in activity overall in every  
26 site. When taking in to account the assumption that in the future all NHS Direct and all GP  
27 out of hours calls will be directed to NHS 111 this increase, ranging from 4.7 -12% per  
28 month, remained. (Table 4).  
29  
30  
31

## 32 **Discussion**

### 33 Summary of findings

34  
35 In the first year of operation NHS 111 pilot sites triaged almost 300,000 calls, 72% of these  
36 calls were managed by non-clinical callhandlers and just over half of calls were directed to  
37 primary care. However, there was no evidence that NHS 111 changed use of most of the  
38 emergency and urgent care services it was possible to measure. There was a large reduction  
39 in use of NHS Direct as calls transferred to NHS 111 but an increase in numbers of  
40 emergency ambulances sent to patients and there is potential that overall demand for  
41 services across the emergency and urgent care system could increase.  
42  
43  
44  
45

### 46 Context of other evidence

47  
48 Policy makers in England established the first national telephone triage service in the world -  
49 NHS Direct - and there was considerable international interest in both this service and the  
50 evaluation of its pilot.[9] A Cochrane systematic review of the impact of telephone triage  
51 services identified that little research had been undertaken on the effect of these telephone  
52 services on emergency services.[10] The lack of impact of NHS 111 on emergency  
53 department attendances replicates the findings from the earlier evaluation of NHS Direct  
54 pilots.[11] The increase in ambulance incidents found in our study was not found for NHS  
55  
56  
57  
58  
59  
60

1  
2  
3 Direct pilots. There is some evidence that telephone triage can reduce the use of general  
4 practice and general practice out of hours.[10, 11] A lack of routine data available for  
5 daytime general practice services in our study means we were unable to assess the impact  
6 of NHS 111 on use of general practice.  
7  
8

9 A key feature of NHS 111 is the use of non-clinical call handlers to assess calls. A systematic  
10 review of appropriateness of and compliance with telephone triage [12] found only two  
11 papers on non-clinical triageurs and these were of little relevance to NHS 111 as no  
12 assessment software was used.  
13  
14

### 15 Strengths and limitations

16  
17 This evaluation has three strengths. First, there is little research evidence about telephone  
18 triage services operated by non-clinical call handlers, and the impact of telephone triage  
19 services on use of the emergency and urgent care system, making this evaluation of NHS  
20 111 a valuable addition to the evidence base. Second, the evaluation is timely given that  
21 NHS 111 was established in pilot status in 2010 and is being rolled out nationally in England  
22 during 2012/13. Third, it is a large controlled study that has included data from a population  
23 of 3.6million people over 36 months on the use of five services as well as NHS111. The  
24 evaluation has three limitations. First, there was considerable 'noise' in the analysis of  
25 impact on services in terms of changes made to the range of services in the emergency and  
26 urgent care system other than NHS 111 in both the pilot and control sites. We recorded 13  
27 different system changes across the pilot and control sites. This made it challenging to  
28 detect the effect of NHS 111 but the time series analysis was a sophisticated approach to  
29 deal with these difficulties. Second, there was no routine data available for a key service  
30 that may have been impacted by NHS 111: day time general practice, so the effects on this  
31 part of the system remain unknown. Finally, the timing of policy evaluations must be  
32 balanced to ensure early feedback to policy makers but also to allow for a service to become  
33 established. This evaluation is based on the first year of operation of a new service and so  
34 whilst early lessons are valuable the impact may change as the service matures and  
35 develops.  
36  
37  
38  
39  
40  
41  
42  
43  
44  
45

### 46 Implications

47  
48 The findings of this study raise five key questions for the development of a national service.  
49 First, the four NHS 111 pilots did not produce some of the key expected benefits in their first  
50 year of operation. In all four pilot sites there was an increase in emergency ambulance  
51 incidents compared to controls and this was statistically significant in one service and for all  
52 services combined. The benefit expected was a reduction in use of this service in the longer  
53 term. In 2011/12 ambulance services in England attended 6.71 million incidents [13] and the  
54 2.9% increase in ambulance incidents we have estimated could potentially result in an  
55 additional 195,000 annual attendances nationally or about 14,500 extra attendances for an  
56  
57  
58  
59  
60

1  
2  
3 ambulance service attending 500,000 incidents per year. It is important to further  
4 investigate and understand how the assessment system triages calls to the ambulance  
5 service in order to avoid unnecessary use of emergency ambulances.  
6

7  
8 Second, all four pilot sites used the same call assessment system – NHS Pathways – to  
9 manage calls to NHS 111. This means the findings reflect the inherent characteristics of the  
10 NHS Pathways system such as the levels of caution and risk built in to the assessment  
11 algorithms, particularly as it is designed to be used by non-clinical call handlers. There may  
12 be less flexibility to change decisions compared to assessments made by nurses [14] and it is  
13 possible than a different call assessment system could produce different results.  
14  
15

16  
17  
18 Third, during our evaluation NHS Direct was still running as an alternative service. The policy  
19 plan is that NHS 111 will replace NHS Direct and there are significant implications to this  
20 strategy. NHS Direct was established to direct people to the right place but also in practice  
21 offers advice to people who do not need contact with a service. The emphasis of NHS 111 is  
22 on direction to right place rather than reassurance and self care advice. In our evaluation  
23 NHS 111 managed predominantly out of hours calls for urgent healthcare. If current callers  
24 to NHS Direct are shifted to NHS 111 the call volumes may increase substantially, the  
25 characteristics of the population using the service may change and consideration will need  
26 to be given to how the principles of NHS 111 in terms of immediate access without waiting,  
27 particularly for clinical advice, can be sustained.  
28  
29

30  
31  
32 Fourth, another important question to consider is whether the introduction of NHS 111 is  
33 creating supplier induced demand and therefore increasing overall demand for emergency  
34 and urgent care. There was some evidence from our system impact analysis that emergency  
35 and urgent care service use had increased overall but we cannot say if this is a real increase  
36 in demand or a shift from in hours GP services. It is possible that, once NHS 111 is a national  
37 service with a higher profile, demand for the service could change either by generating new  
38 demand or by people using it as an alternative to in hours primary care, or a combination of  
39 both.  
40  
41

42  
43  
44 Finally, it is useful to reflect on the expectations of the service. The provision of a telephone  
45 service which quickly guides people needing urgent care advice to the most appropriate  
46 service is sensible given repeatedly expressed concerns by the general public about  
47 confusion around which service to access when needing urgent care. Key aspects of the  
48 service such as an easy-to-remember number, emphasis on fast triage and smooth transfer  
49 to the 'right service, first time' are desired by the general public. In our evaluation we found  
50 that alongside implementation of NHS 111 there were various re-organisations of  
51 services and implementation of demand management schemes in both the pilot and control  
52 sites. It is probably unrealistic to expect any one service, such as NHS 111, to do everything  
53 and real improvements may only be gained when a series of co-ordinated measures  
54 designed to increase efficiency across all services are implemented.  
55  
56  
57  
58  
59  
60

## References

1. Department of Health. Direction of Travel for Urgent Care.2006; [Online] Available at: [http://webarchive.nationalarchives.gov.uk/+www.dh.gov.uk/en/consultations/Liveconsultations/DH\\_4139428](http://webarchive.nationalarchives.gov.uk/+www.dh.gov.uk/en/consultations/Liveconsultations/DH_4139428)
2. O'Cathain, A., Coleman, P., Nicholl, J.. Characteristics of the emergency and urgent care system important to patients: a qualitative study. *Journal of Health Services Research & Policy* 2008;2: 19-25.
3. Department of Health. .High Quality Care for All: NHS Next Stage Review final report. 2008[Online] Available at: [http://www.dh.gov.uk/en/Publicationsandstatistics/Publications/PublicationsPolicyAndGuidance/DH\\_085825](http://www.dh.gov.uk/en/Publicationsandstatistics/Publications/PublicationsPolicyAndGuidance/DH_085825)
4. NHS Connecting for Health. Introduction to NHS 111. 2011; [Online] Available at: <http://www.connectingforhealth.nhs.uk/systemsandservices/pathways/news/nhs111intro.pdf>
5. NHS Connecting for Health. NHS Pathways care narrative. 2012; [Online] Available at: <http://www.connectingforhealth.nhs.uk/systemsandservices/pathways/comms/corenav.pdf>
6. Department of Health. NHS 111 statistics. [Online] Available at: <http://transparency.dh.gov.uk/category/statistics/nhs-111-statistics>
7. Campbell MJ. Time Series Regression in Encyclopedia of Biostatistics. Edited by Peter Armitage and Theodore Colton. John Wiley & Sons, Ltd, Chichester, 1998. (ISBN 0471 975761
8. StataCorp. 2011. Stata: Release 12. Statistical Software. College Station, TX: StataCorp LP.
9. Munro, J., Nicholl, J., O'Cathain, A., Knowles, E. et al, Evaluation of NHS Direct first wave sites. Final report of the phase I research. *Medical Care Research Unit*, 2001; University of Sheffield.
10. Bunn, F., Byrne, G. and Kendall, S. The effects of telephone consultation and triage on healthcare use and patient satisfaction: a systematic review. *British Journal of General Practice* 2005; 55: 956-961.
11. Munro, J.F., Nicholl, J.P., O'Cathain, A. and Knowles, E. Impact of NHS Direct on demand for immediate care: observational study. *British Medical Journal* 2000; 321: 150-3.
12. Blank L, Coster J, O'Cathain A, Knowles E, Tosh J, Turner J, Nicholl J. The appropriateness of, and compliance with, telephone triage decisions: a systematic review and narrative synthesis. *Journal of Advanced Nursing* 2012; 68(12): 2610-2621.

1  
2  
3 13. NHS Information Centre. Ambulance Services – 2011/2012. NHS Information Centre  
4 2012;.[Online] Available at: [http://www.ic.nhs.uk/statistics-and-data-collections/audits-](http://www.ic.nhs.uk/statistics-and-data-collections/audits-and-performance/ambulance/ambulance-services--england-2011-12)  
5 [and-performance/ambulance/ambulance-services--england-2011-12](http://www.ic.nhs.uk/statistics-and-data-collections/audits-and-performance/ambulance/ambulance-services--england-2011-12)  
6

7  
8 14. Snooks H, Griffiths L, Peconi J, Rance J, Snelgrove S, Sarangi S et al. Real Nursing? The  
9 development of telenursing. Journal of Advanced Nursing 2008; 61(6): 631-640.  
10

#### 11 12 13 Data Sharing:

14 A dataset of aggregated monthly contact counts for 5 emergency and urgent care services in  
15 7 sites for 36 months is available on request from the corresponding author at  
16 [j.turner@sheffield.ac.uk](mailto:j.turner@sheffield.ac.uk)  
17

18 The Department of Health publish monthly open access activity data for NHS 111 services  
19 available at <http://transparency.dh.gov.uk/category/statistics/nhs-111-statistics/>  
20  
21

#### 22 23 Acknowledgements:

24 We would like to thank: Professor Simon Dixon for advice about the economic analysis; Neil  
25 Shephard for statistical help with the system impact analysis and Dr Claire Ginn for  
26 obtaining the routine data used in the impact analysis.  
27

#### 28 29 Contributors:

30 JT and AOC conceived the study and designed it with help from JN and EK. JN conducted the  
31 system impact analysis. JT wrote the first draft of the paper. All authors assisted in the  
32 interpretation of data and revising the paper and approved the final draft. JT is the  
33 guarantor.  
34

#### 35 36 Funding:

37 The study was funded as an independent research project by the Policy Research  
38 Programme in the Department of Health. The Department of Health contributed to the  
39 development of the research questions to be addressed. The funders had no role in  
40 conducting the study, writing the paper or the decision to submit the paper for publication.  
41 The views expressed in this paper are not necessarily those of the Department of Health.  
42

#### 43 44 Ethics:

45 The study was approved by the Leeds (Central ) Research Ethics Committee Reference  
46 number 10/H1313/57. NIHR CRN study ID: 9275  
47

#### 48 49 Competing interests:

50 All authors have completed the Unified Competing Interest form at  
51 [www.icmje.org/coi\\_disclosure.pdf](http://www.icmje.org/coi_disclosure.pdf) (available on request from the corresponding author) and  
52 declare: the Department of Health Policy Research programme provided grant funding to  
53 the Medical Care Research Unit, University of Sheffield. AOC and JN are co-applicants on a  
54 research grant with NHS Direct studying tele-health for people with long term conditions. A  
55 family member of AOC won a contract to offer patient feedback for NHS 111 sites in London  
56 in June 2012.  
57  
58  
59  
60

1  
2  
3  
4  
5 The Corresponding Author has the right to grant on behalf of all authors and does grant on  
6 behalf of all authors, [a worldwide licence](#) to the Publishers and its licensees in perpetuity, in  
7 all forms, formats and media (whether known now or created in the future), to i) publish,  
8 reproduce, distribute, display and store the Contribution, ii) translate the Contribution into  
9 other languages, create adaptations, reprints, include within collections and create  
10 summaries, extracts and/or, abstracts of the Contribution, iii) create any other derivative  
11 work(s) based on the Contribution, iv) to exploit all subsidiary rights in the Contribution, v)  
12 the inclusion of electronic links from the Contribution to third party material where-ever it  
13 may be located; and, vi) licence any third party to do any or all of the above.  
14  
15  
16  
17  
18  
19  
20  
21  
22  
23  
24  
25  
26  
27  
28  
29  
30  
31  
32  
33  
34  
35  
36  
37  
38  
39  
40  
41  
42  
43  
44  
45  
46  
47  
48  
49  
50  
51  
52  
53  
54  
55  
56  
57  
58  
59  
60



1  
2  
3  
4  
5  
6  
7  
8  
9  
10  
11  
12  
13  
14  
15  
16  
17  
18  
19  
20  
21  
22  
23  
24  
25  
26  
27  
28  
29  
30  
31  
32  
33  
34  
35  
36  
37  
38  
39  
40  
41  
42  
43  
44  
45  
46  
47  
48  
49  
50  
51  
52  
53  
54  
55  
56  
57  
58  
59  
60

For peer review only

**Table 1: Demographic characteristics of pilot and control sites**

|                                                       | Pilot Sites                                |                       |                        |                           | Control Sites                                    |                        |                       |
|-------------------------------------------------------|--------------------------------------------|-----------------------|------------------------|---------------------------|--------------------------------------------------|------------------------|-----------------------|
|                                                       | Durham & Darlington                        | Nottingham            | Lincolnshire           | Luton                     | North of Tyne                                    | Norfolk                | Leicester City        |
| Population (000's)                                    | 620                                        | 305                   | 735                    | 700<br>(Northamptonshire) | 780                                              | 740                    | 280                   |
| SHA                                                   | North East                                 | East Midlands         | East Midlands          | East of England           | North East                                       | East of England        | East Midlands         |
| ONS Area Classification of Primary Care Organisations | Industrial Hinterlands                     | Centres with Industry | Prospering small towns | London Suburbs            | Industrial Hinterlands<br>Prospering small towns | Prospering small towns | Centres with Industry |
| ONS Rural/Urban Local Authority Classification        | Predominantly Urban<br>Predominantly Rural | Predominantly Urban   | Predominantly Rural    | Predominantly Urban       | Predominantly Urban<br>Predominantly Rural       | Predominantly Rural    | Predominantly Urban   |
| NHS 111 service live                                  | August 2010                                | November 2010         | November 2010          | December 2010             |                                                  |                        |                       |

**Table 2: Total numbers of NHS 111 calls received, answered, triaged and transferred for nurse assessment in one year**

|                                             | <b>Durham &amp; Darlington</b> | <b>Nottingham City</b> | <b>Lincolnshire</b> | <b>Luton</b>  | <b>All NHS 111 sites</b> |
|---------------------------------------------|--------------------------------|------------------------|---------------------|---------------|--------------------------|
| Population covered                          | 606,800                        | 300,800                | 700,300             | 194,300       | 1,802,200                |
| Total number of calls connected to 111      | 209,633                        | 58,397                 | 102,611             | 38,210        | 408,851                  |
| Direct dial 111 n (%)                       | 106,961 (51)                   | 18,354 (31.4)          | 102,611 (100)       | 23,264 (60.8) | 251,190 (61.4)           |
| Switched from other sources n (%)           | 102,672 (49)                   | 40,043 (68.6)          | 0                   | 14,946 (39.2) | 157,661 (38.6)           |
| Answerable calls n (%)                      | 165,355 (78.9)                 | 56,539 (96.8)          | 100,144 (97.6)      | 37,497 (98.1) | 359,535 (87.9)           |
| Answered calls n (% of answerable calls )   | 161,082 (97.4)                 | 55,564 (98.2)          | 99,381 (99.2)       | 37,073 (98.8) | 353,100 (98.2)           |
| Triaged calls n (% of answered calls)       | 114,686 (71.2)                 | 44,937 (80.9)          | 85,509 (86.0)       | 32,031 (86.4) | 277,163 (78.5)           |
| Transferred to nurse n (% of triaged calls) | 24,488 (21.3)                  | 13,261 (29.5)          | 28,871 (33.7)       | 10,779 (33.6) | 77,399 (27.9)            |
| Triaged calls per year per 1,000 people     | 189                            | 150                    | 122                 | 165           | 154                      |

**Table 3 Summary of estimated effects of NHS 111 on other emergency and urgent care services: % change in monthly activity counts**

| Service activity                                                                | Pilot only model - Estimated change in monthly service activity per 1000 triaged NHS 111 calls after the introduction of NHS 111 | Pilot v Control model – estimated % change in monthly activity (95%CI) in pilot sites compared to control sites after the introduction of NHS 111 |
|---------------------------------------------------------------------------------|----------------------------------------------------------------------------------------------------------------------------------|---------------------------------------------------------------------------------------------------------------------------------------------------|
| <b>ED attendances</b>                                                           | -1 (-66, +64) fewer attendances                                                                                                  | -0.1% (-3.8%, +3.7%)                                                                                                                              |
| <b>GPOOH, WiC, UCC. MIU attendances</b>                                         | +47 (-66, +159) extra attendances                                                                                                | +2.5% (-3.5%, +8.5%)                                                                                                                              |
| <b>Calls to NHS Direct</b>                                                      | -102 (-130, -74) fewer calls                                                                                                     | -19.3% (-24.6%, -14.0%)                                                                                                                           |
| <b>Calls to 999 ambulance service</b>                                           | +3 (-31, +37) more calls                                                                                                         | +0.3% (-3.1%, +3.7%)                                                                                                                              |
| <b>Ambulance 999 incidents where an ambulance arrives at the incident scene</b> | +24 (+8, +39) more incidents                                                                                                     | +2.9% (+1.0%, +4.8%)                                                                                                                              |

**Table 4: Average monthly contacts (000s) with services in the emergency and urgent care system before and after the launch of NHS 111 (based on routine data)**

|                                                                                              | Durham & Darlington | Change (%) | Nottingham | Change (%) | Luton  | Change (%) | Lincolnshire | Change (%) |       |       |       |       |
|----------------------------------------------------------------------------------------------|---------------------|------------|------------|------------|--------|------------|--------------|------------|-------|-------|-------|-------|
|                                                                                              | Before              | After      | Before     | After      | Before | After      | Before       | After      |       |       |       |       |
| EDs                                                                                          | 13675               | 13142      | -3.9       | 7505       | 7945   | +5.8       | 3474         | 3638       | +4.7  | 14293 | 14117 | -1.2  |
| Urgent                                                                                       | 13667               | 14729      | +7.7       | 8561       | 9424   | +11        | 7573         | 6135       | -19   | 12374 | 13222 | +6.8  |
| NHS Direct                                                                                   | 3978                | 2201       | -44.7      | 3016       | 2186   | -27.5      | 1547         | 1068       | -31   | 3660  | 2655  | -27.2 |
| Ambulance calls                                                                              | 6479                | 6895       | +6.4       | 4824       | 5319   | +10.3      | 2626         | 2857       | +8.8  | 7307  | 8480  | +16.1 |
| Ambulance incidents                                                                          | 5304                | 5734       | +8.1       | 4276       | 4538   | +6.1       | 2239         | 2488       | +11.1 | 6989  | 7657  | +9.6  |
| All services                                                                                 | 43103               | 42701      | -1         | 28182      | 29412  | +4.2       | 17459        | 16186      | -7.3  | 44623 | 46131 | +3.3  |
| Estimated NHS 111                                                                            | 0                   | 10000      |            | 0          | 3500   |            | 0            | 3000       |       | 0     | 10000 |       |
| Total with NHS 111                                                                           | 43103               | 52701      | +18.2      | 28182      | 32914  | +14.4      | 17459        | 19186      | +9.1  | 44623 | 56131 | +20.5 |
| Total contacts assuming all NHS Direct calls taken by NHS 111                                | 43103               | 50924      | +15.4      | 28182      | 32084  | +12.2      | 17459        | 18707      | +6.7  | 44623 | 55126 | +19   |
| Total contacts assuming all NHS Direct calls and all estimated GP OOH calls taken by NHS 111 | 48003               | 50924      | +5.7       | 30582      | 32084  | +4.7       | 17459        | 18707      | +6.7  | 48523 | 55126 | +12   |

1  
2  
3  
4  
5  
6  
7 **Impact of the urgent care telephone service NHS 111 pilot sites: a controlled before and**  
8 **after study**  
9

10  
11 J Turner

12  
13 Senior Research Fellow, Medical Care Research Unit, ScHARR, University of Sheffield, Regent  
14 Court, 30 Regent Street, Sheffield S1 4DA  
15

16 J Nicholl

17  
18 Dean, Medical Care Research Unit, ScHARR, University of Sheffield, Regent Court, 30 Regent  
19 Street, Sheffield S1 4DA  
20

21 A O’Cathain

22  
23 Professor of Health Services Research, Medical Care Research Unit, ScHARR, University of  
24 Sheffield, Regent Court, 30 Regent Street, Sheffield S1 4DA  
25

26 E Knowles

27  
28 Research Fellow, Medical Care Research Unit, ScHARR, University of Sheffield, Regent Court,  
29 30 Regent Street, Sheffield S1 4DA  
30

31  
32  
33 Corresponding author: [j.turner@sheffield.ac.uk](mailto:j.turner@sheffield.ac.uk)  
34

35 Medical Care Research Unit, ScHARR, University of Sheffield, Regent Court, 30 Regent  
36 Street, Sheffield S1 4DA  
37  
38  
39  
40  
41  
42  
43  
44  
45  
46  
47  
48  
49  
50  
51  
52  
53  
54  
55  
56  
57  
58  
59  
60

**Abstract**

**Objectives:** To measure the impact of the urgent care telephone service NHS 111 on the emergency and urgent care system.

**Design:** Controlled before and after study using routine data.

**Setting:** Four pilot sites and three control sites covering a total population of 3.6million in England, UK.

**Participants and data:** Routine data on 36 months of use of emergency ambulance service calls and incidents, emergency department attendances, urgent care contacts (GP out of hours, walk in and urgent care centres) and calls to the telephone triage service NHS Direct.

**Intervention:** NHS 111, a new 24 hour 7 day a week telephone service for non-emergency health problems, operated by trained non-clinical call handlers with clinical support from nurse advisors, using NHS Pathways software to triage calls to different services and home care.

**Main outcomes:** Changes in use of emergency and urgent care services.

**Results:** NHS 111 triaged 277,163 calls in the first year of operation for a population of 1.8 million. There was no change overall in emergency ambulance calls, emergency department attendances or urgent care use. There was a 19.3% reduction in calls to NHS Direct (95%CI - 24.6% to 14.0%) and a 2.9% increase in emergency ambulance incidents (95%CI 1.0% to 4.8%). There was an increase in activity overall in the emergency and urgent care system in each site ranging from 4.7 -12% per month and this remained when assuming that NHS 111 will eventually take all NHS Direct and GP Out of Hours calls.

**Conclusions:** In its first year of operation in four pilot sites NHS 111 did not deliver the expected system benefits of reducing calls to the 999 ambulance service or shifting patients to urgent rather than emergency care. There is potential that this type of service increases overall demand for urgent care.

## Article Summary

### Article Focus

- NHS 111 is a new telephone service for accessing urgent care where calls are assessed by non-clinical call handlers with clinician support.
- The aim of the service is to direct callers to the “right place, first time” and improve emergency and urgent care system efficiency.
- We have evaluated the first year of operation in four pilot sites to assess whether the new service achieves the objective of improving system efficiency.

### Key messages

- In the first year of operation 72% of triaged calls to NHS 111 were managed by non-clinical call handlers and the service met quality standards.
- NHS 111 did not achieve the objective of increasing emergency and urgent care system efficiency. There was a significant increase in emergency ambulance incidents and an overall increase in use of emergency and urgent care services.

### Strengths and limitations

- This is the first controlled evaluation of the impact of the NHS 111 service on the emergency and urgent care system in England. This is timely as the service is being rolled out nationally.
- There is limited evidence on the use of non-clinical call handlers to triage requests for urgent care and this study adds to the evidence base.
- Although we conducted a controlled study other system changes made it difficult to isolate the effects of NHS 111 and we were unable to assess the potential impact on in hours GP services.



## Introduction

A consultation by policy makers in England identified that a key frustration in the general population was access to urgent care. ~~for urgent health problems that are not emergencies, that is, are not life-threatening or life changing.~~ [1] Urgent care is defined as “the range of responses to people who require or perceive they need for urgent advice, care, treatment or diagnosis”. [1] Problems faced by users of emergency and urgent care included a lack of awareness of services available, confusion about which service to access and multiple service contacts for the same episode. [2] In England in 2000 a national 24 hour telephone line for advice about health problems, NHS Direct, was established to address similar frustrations. Calls are answered by a non-clinical call handler and assessed by a nurse either immediately or with a later call back. Despite this service the national consultation found that access problems persisted. [1]

NHS 111 was developed as a solution to these problems by offering a telephone service to manage all requests for urgent help [3] including requests for out of hours primary care, urgent problems that may currently be directed to 999 ambulance services and health information and advice. ~~The~~ with some key differences from NHS Direct are - access via a free to call, easily remembered three digit telephone number ‘111’; calls answered and assessed immediately by a trained non-clinical call handler without waiting or call backs; only some calls assessed by a nurse; and integration of the assessment system with services enabling direct referral to, or appointments to be made with, some services at the time of the call.

The expected benefits of NHS 111 were to improve access to urgent care, increase efficiency by directing people to the ‘right place first time’ including self care advice, increase satisfaction with urgent care and the national health service (NHS) generally, and in the longer term reduce unnecessary calls to the 999 emergency ambulance service and so begin to rectify concerns about inappropriate use of emergency services. [4]

NHS 111 was established in four pilot sites in England in 2010. It is rapidly becoming available nationally and there is international interest in telephone access to urgent care via non-clinical triage. A mixed methods evaluation focusing on processes, outcomes and costs was conducted in the four pilot sites. We report here on the specific outcome of NHS 111 improving efficiency of service use across the emergency and urgent care system by shifting care from emergency to urgent services. The objective was to assess the impact of NHS 111 on the emergency and urgent care system by examining demand for other urgent and emergency care services to detect if there was any change in how services were used.

## Methods

### Setting and service

1  
2  
3  
4  
5  
6  
7 Pilot services were established in four geographical areas defined by primary care trusts, the  
8 health care commissioning organisations operating in England in 2010. Durham & Darlington  
9 is an urban area with a population of around 606,000; Nottingham is a city of around  
10 300,000 with a large minority ethnic population; Luton is a city of around 200,000 with a  
11 large minority ethnic population; and Lincolnshire is a largely rural area with a city, of  
12 population 700,000. The four sites were chosen by the English Department of Health  
13 following a request for expressions of interest from commissioning organisations already  
14 planning or considering changing telephone access to urgent care. Call handling was  
15 provided by an ambulance service in one site and NHS Direct in three sites. In all sites NHS  
16 111 could be accessed directly by dialling "111" or indirectly where GP out of hours call  
17 handling services were routed to NHS 111. Calls to NHS 111 are answered and assessed by  
18 trained non-clinical call handlers using the NHS Pathways assessment system.[5] If needed,  
19 calls can be transferred for additional assessment and advice from an onsite trained nurse.  
20 At the end of the assessment callers are matched to the most appropriate service available  
21 at the time of their call from a range of services within the callers' locality using an  
22 electronic Directory of Services linked to the assessment system. This can include  
23 emergency ambulance, emergency department, urgent care centre, walk in centre, minor  
24 injury unit, general practice (GP) out of hours service, in hours GP, community services, or  
25 home care. Referrals can be made to some services by NHS 111 at the time of the call, for  
26 example, direct dispatch of an emergency ambulance, appointment booking and transfer of  
27 the call to another telephone based service. A description of the NHS 111 service is  
28 provided as a supplemental file [S1].  
29  
30  
31  
32

### 33 Design

34  
35 The design of this part of the evaluation was a [descriptive study of NHS 111 service use and](#)  
36 [a controlled before and after study using a time series analysis of routine service activity](#)  
37 [data. Control sites were selected to match \*\*equivalent geographical areas to\*\* the pilot sites](#)  
38 [using a two stage process: 1\) potential sites were identified by primary care trust area type](#)  
39 [\(county or city\), urban/rural mix and same Strategic Health Authority \(SHA\) or nearest](#)  
40 [neighbour; 2\) from 12 potential sites the final choice was made after matching for a range of](#)  
41 [18 criteria based on population demographics, lifestyle, health profile and health service](#)  
42 [use. A table listing all criteria is provided as a supplemental file \[S2\]. It was important that](#)  
43 [control sites had no plans to introduce NHS 111 or make major changes to their emergency](#)  
44 [and urgent care system in the time frame of the evaluation. We identified three suitable](#)  
45 [control sites: North of Tyne, Leicester and Norfolk. Leicester was the best match for two](#)  
46 [pilot sites \(Nottingham and Luton\). \*\*The control site for Luton is not in the same SHA but was\*\*](#)  
47 [the best match for all other criteria and was the only suitable nearest neighbour SHA. For](#)  
48 [the main impact analysis sites have been combined to provide single pilot and control sites.](#)  
49  
50 The characteristics of the pilot and control sites are presented in Table 1. For the analyses  
51 reported here data from all pilot sites were combined and compared with data from all  
52  
53  
54  
55  
56  
57  
58  
59  
60

control sites. Randomisation of sites to be pilots or controls was not possible because the four pilot sites were pre-selected by the Department of Health.

The four pilot sites became fully operational at different times from July to December 2010. The study periods used were the first full year of operation of NHS 111 and the corresponding 2 years prior to the service starting. [During the course of the evaluation NHS Direct continued to operate as a national service within the pilot site areas.](#)

### Participants

Participants were users of the emergency and urgent care systems in the seven pilot and control sites recorded in routine service activity data as having accessed and used a range of emergency or urgent care services during the study periods.

### Data collection

#### Use of NHS 111

A minimum data set (MDS) was created by the English Department of Health to provide information on NHS 111 service operation. All NHS 111 services submit monthly data and a MDS of activity for combined and individual services is published each month by the Department of Health.[6] The MDS records activity include numbers of: calls to the service; abandoned calls; triaged calls and transfer times for calls requiring clinical advice from a nurse. The dispositions of NHS 111 calls are recorded in five main categories: 1) ambulance dispatches; 2) recommended to attend Emergency Department; 3) recommended to attend primary and community care (including GP, urgent care, dental and pharmacy services); 4) recommended to attend another service (including community nursing, midwives, social services, opticians); 5) not recommended to attend a service (including home or self care and health information). We used the monthly routine minimum data set counts for each pilot site for the first year of operation to describe call volumes, numbers and proportions of triaged calls and calls passed for nurse assessment and the disposition arrived at following NHS Pathways assessment.

#### Routine data on use of key services

NHS 111 had the potential to produce an impact on activity across a range of emergency and urgent care services: calls to the emergency ambulance service; ambulance incidents, that is, an ambulance ~~is sent and arrives at~~ [sent to](#) the scene of the emergency [incident](#); emergency department (ED) attendances; contacts with urgent care services such as GP out of hours, urgent care centres, walk in centres or minor injury units; the telephone triage

1  
2  
3  
4  
5  
6  
7 service NHS Direct; same day general practice attendances; and a range of community  
8 services such as district nursing, dentists and pharmacies. Data are routinely available for  
9 ~~the first five services only. We collected monthly counts of use of these services (ambulance~~  
10 calls and incidents, ED, urgent care and NHS Direct) by residents in the seven geographical  
11 areas – four pilot and three control sites - for 24 months prior to the start of NHS 111 (2008-  
12 10) and the same data plus calls to NHS 111 in the pilot areas for 12 months after (2010-11).  
13 Due to a lack of data availability for separate urgent care services, we had to combine data  
14 for out of hours primary care contacts, walk in centre attendances and urgent care centre  
15 attendances. The sources of this data were NHS data collections (Secondary Users Service  
16 and Weekly Situation reports) and local management information reports provided by the  
17 study sites. [For local management information reports a set of data items and definitions](#)  
18 [was used to standardise data collection across all sites. In one pilot area data on one urgent](#)  
19 [care contact data item was missing and therefore inputted from the previous and](#)  
20 [subsequent 3 months activity. All](#) This data was collected and collated by the Department of  
21 Health Commissioning Analysis and Intelligence Team.  
22  
23  
24

25 We also needed to account for changes to services in the emergency and urgent care  
26 system other than NHS 111 occurring in the 36 months. NHS 111 leads and control site  
27 evaluation contacts were asked to provide details of changes to emergency and urgent care  
28 services occurring in study sites during the study time periods. We also searched primary  
29 care trust annual reports for 2009/10 and 2010/11 for each study site to identify any  
30 reported major changes to the emergency and urgent care system.  
31  
32

### 33 Analysis

34  
35 For the service use analysis we fitted a time series regression model [7] to the combined  
36 pilot site counts to test for preliminary evidence that service use had changed over time.  
37 This model consisted of a month effect to help explain variation due to seasonal  
38 fluctuations, an overall trend, a before and after step term for other potentially significant  
39 changes introduced into the pilot site, and a term for before and after the time when NHS  
40 111 was launched. [This was the pilot only model.](#)  
41  
42

43 We then tested for changes in the pilot sites compared to the control sites using time series  
44 regression to test for the impact of NHS 111. We used a simple model with three main  
45 elements: 1) The basic model, consisting of a linear time trend in activity over the 36 months  
46 constrained to be the same in the pilot and control sites, plus a seasonal effect and a site  
47 effect. 2) Site specific before and after terms to allow for effects of potentially significant  
48 service changes other than NHS 111 introduced during the 36 months e.g. relocation of an  
49 emergency department. 3) A term for the regression of the monthly activity counts on the  
50 volume of NHS 111 calls that were triaged that month (the 'dose'). By definition the dose is  
51 zero for all months in the control sites and up until the launch of NHS 111 in the pilot sites.  
52 This regression allowed us to directly estimate the impact of different levels of NHS 111  
53 activity.  
54  
55  
56  
57  
58  
59  
60

1  
2  
3  
4  
5  
6  
7 We used the regression coefficient to estimate the impact on monthly service use per  
8 thousand NHS 111 calls for the pilot sites. The models were fitted and coefficients and  
9 standard errors estimated assuming normal errors with constant variance in the monthly  
10 activity counts. To check the assumption of constant variance, we also fitted models to the  
11 square root of the counts which helps stabilise the variance. This produced no important  
12 differences in fit so results using the raw count models are reported here [as the pilot versus](#)  
13 [control model](#). We used the Prais-Winsten procedure in STATA version 12 to fit the time  
14 series regression models.[8]  
15

16 [We considered the potential impact of NHS 111 on overall demand for the emergency and](#)  
17 [urgent care system as this adds an extra service and can potentially add an extra contact if it](#)  
18 [does not reduce use of other services in the system. We used the routine data to measure](#)  
19 [monthly use of the different services in each pilot site before and after the introduction of](#)  
20 [NHS 111 and hence overall use of the emergency and urgent care system. We have then](#)  
21 [estimated the effect on the system taking two additional factors in to account 1\) in the](#)  
22 [“after” period NHS Direct and NHS 111 were operating concurrently so we have estimated](#)  
23 [the effect if all NHS Direct calls are taken by NHS 111 and 2\) in the “before” period GP out of](#)  
24 [hours calls \(rather than contacts\) were taken by a number of providers so we have](#)  
25 [estimated the number of these calls using the routine NHS 111 data on calls diverted from](#)  
26 [out of hours providers. The assumption of all NHS Direct and out of hours calls being](#)  
27 [managed by NHS 111 reflects the intended national service.](#)  
28  
29  
30  
31  
32  
33  
34  
35  
36

Formatted: Space After: 6 pt, Line spacing:  
Exactly 16 pt

## 37 **Results**

### 38 Use of NHS 111

39  
40 In the first year of operation over 400,000 calls were made to NHS 111 (Table 2). Two thirds  
41 were direct dial of the telephone number '111' by members of the general public and the  
42 other third were routed to the service from GP out of hours services. 22% of calls were  
43 unanswerable because the caller hung up within 30 seconds. These calls were  
44 predominately not intended for NHS 111 but were from people calling their general practice  
45 in the morning to make an appointment with their GP before the out of hours rerouting  
46 mechanism was switched off. 98% of answerable calls were answered and 277,163 (78%) of  
47 these were triaged by a call handler using the NHS Pathways assessment system. Reasons  
48 for not triaging calls were that the caller hung up, the call was transferred without triage  
49 (for example for a 999 ambulance), or health information only was given. The annual rate of  
50 triaged calls per 1000 population was 154. All pilot sites met national quality requirements  
51 for call abandonment rates of no more than 5%, and 95% of calls answered within 60  
52  
53  
54  
55  
56  
57  
58  
59  
60

seconds. 28% of calls were transferred to a nurse for clinical advice although transfers were lower in the ambulance service provided site (21.3%) than in the NHS Direct provided sites (27.9 – 33.7%). For all sites combined, over half of triaged calls were assessed as requiring primary or urgent care, that is, GP practice, GP out of hours, walk in centres, urgent care centres, minor injury units, dental service or pharmacist (Figure 1).

#### Impact on emergency and urgent care services

[Across all pilot and control sites there were 13 other system changes reported that were taken in to account in the analysis including the opening, closing and relocation of urgent care and walk in centres, relocation of an emergency department, ED attendance reduction schemes, ambulance service conveyance direct to walk in centres and related publicity campaigns.](#)

Following the introduction of NHS 111, in individual pilot sites there was a statistically significant reduction in urgent care attendances in one site; reduction in calls to NHS Direct in three sites; reduction in ambulance emergency calls in one site and increase in one site, and an increase in ambulance incidents in one site.

For all sites combined, overall, there was no change in three of the five services measured that could be attributed to NHS 111 (Table 3). There was a large and statistically significant reduction in calls to NHS Direct of 102 fewer NHS Direct calls per triaged 1000 calls to NHS 111 equating to a 19.3% (95% CI -24.6% to 14.0%) reduction in monthly NHS Direct activity. There was also a small and statistically significant increase in numbers of ambulance incidents of an extra 24 ambulance incidents per 1000 triaged calls to NHS 111 equating to an increase of 2.9% (95% CI 1.0% to 4.8%) in monthly ambulance activity.

[For all sites and services combined, The counts of contacts with all services in the pilot sites shows that monthly use of the established services in the system slightly increased or slightly decreased, depending on the site but monthly use of the established services in the system varied depending on the site but](#) when NHS 111 use was added in, there was an increase in activity overall in every site. [When taking in to account the assumption that in the future all NHS Direct and all GP out of hours calls will be directed to NHS 111 and this increase, ranging from 4.7 -12% per month, remained. with the assumption that NHS 111 will eventually take all NHS Direct calls and GP Out of Hours calls](#) (Table 4).

#### Discussion

##### Summary of findings

In ~~its~~ the first year of operation [NHS 111](#) in pilot sites [triaged almost 300,000 calls, 72% of these calls were managed by non-clinical callhandlers and just over half of calls were directed to primary care.](#) However, there was no evidence that NHS 111 changed use of most of the emergency and urgent care services it was possible to measure. There was a

1  
2  
3  
4  
5  
6  
7 large reduction in use of NHS Direct as calls transferred to NHS 111 but an increase in  
8 numbers of emergency ambulances sent to patients [and there is potential that overall](#)  
9 [demand for services across the emergency and urgent care system could increase.](#)  
10

#### 11 Context of other evidence

12  
13 Policy makers in England established the first national telephone triage service in the world -  
14 NHS Direct - and there was considerable international interest in both this service and the  
15 evaluation of its pilot.[9] A Cochrane systematic review of the impact of telephone triage  
16 services identified that little research had been undertaken on the effect of these telephone  
17 services on emergency services.[10] The lack of impact of NHS 111 on emergency  
18 department attendances replicates the findings from the earlier evaluation of NHS Direct  
19 pilots.[11] The increase in ambulance incidents found in our study was not found for NHS  
20 Direct pilots. There is some evidence that telephone triage can reduce the use of general  
21 practice and general practice out of hours.[10, 11] A lack of routine data available for  
22 daytime general practice services in our study means we were unable to assess the impact  
23 of NHS 111 on use of general practice.  
24  
25

26 A key feature of NHS 111 is the use of non-clinical call handlers to assess calls. A systematic  
27 review of appropriateness of and compliance with telephone triage [12] found only two  
28 papers on non-clinical triageurs and these were of little relevance to NHS 111 as no  
29 assessment software was used.  
30

#### 31 Strengths and limitations

32  
33 This evaluation has three strengths. First, there is little research evidence about telephone  
34 triage services operated by non-clinical call handlers, and the impact of telephone triage  
35 services on use of the emergency and urgent care system, making this evaluation of NHS  
36 111 a valuable addition to the evidence base. Second, the evaluation is timely given that  
37 NHS 111 was established in pilot status in 2010 and is being rolled out nationally in England  
38 during 2012/13. Third, it is a large controlled study that has included data from a population  
39 of 3.6million people over 36 months on the use of five services as well as NHS111. The  
40 evaluation has three limitations. First, there was considerable 'noise' in the analysis of  
41 impact on services in terms of changes made to the range of services in the emergency and  
42 urgent care system other than NHS 111 in both the pilot and control sites. We recorded 13  
43 different system changes across the pilot and control sites, [including relocation of an](#)  
44 [emergency department, reconfiguration of walk-in and urgent care centres and emergency](#)  
45 [department diversion schemes.](#) This made it challenging to detect the effect of NHS 111 but  
46 the time series analysis was a sophisticated approach to deal with these difficulties. Second,  
47 there was no routine data available for a key service that may have been impacted by NHS  
48 111: day time general practice, so the effects on this part of the system remain unknown.  
49 Finally, the timing of policy evaluations must be balanced to ensure early feedback to policy  
50 makers but also to allow for a service to become established. This evaluation is based on the  
51  
52  
53  
54  
55  
56  
57  
58  
59  
60

1  
2  
3  
4  
5  
6  
7 first year of operation of a new service and so whilst early lessons are valuable the impact  
8 may change as the service matures and develops.  
9

### 10 Implications

11  
12 The findings of this study raise [four-five](#) key questions for the development of a national  
13 service. First, the four NHS 111 pilots did not produce some of the key expected benefits in  
14 their first year of operation. In [all four pilot sites there was an increase in fact they increased](#)  
15 [use of](#) emergency ambulance incidents [compared to controls and this was statistically](#)  
16 [significant in one service and for all services combined.](#) ~~When~~ the benefit expected was a  
17 reduction in use of this service in the longer term. In 2011/12 ambulance services in England  
18 attended 6.71 million incidents [13] and the 2.9% increase in ambulance incidents we have  
19 estimated could potentially result in an additional 195,000 annual attendances nationally or  
20 about 14,500 extra attendances for an ambulance service attending 500,000 incidents per  
21 year. It is important to further investigate and understand how the assessment system  
22 triages calls to the ambulance service in order to avoid unnecessary use of emergency  
23 ambulances.  
24  
25  
26

27  
28 [Second, all four pilot sites used the same call assessment system – NHS Pathways – to](#)  
29 [manage calls to NHS 111. From an evaluation point of view this provided an advantage as](#)  
30 [the assessment system was consistent. Different systems would have added another](#)  
31 [confounder particularly to the impact analysis. However, it does This means the findings](#)  
32 [reflect the inherent characteristics of the NHS Pathways system such as the levels of caution](#)  
33 [and risk built in to the assessment algorithms, particularly as it is designed to be used by](#)  
34 [non-clinical call handlers. There may be less flexibility to change decisions compared to](#)  
35 [assessments made by nurses \[14\] and it is possible than a different call assessment system](#)  
36 [could produce different results.](#)  
37  
38

39  
40 ~~Third~~[Second](#), during our evaluation NHS Direct was still running as an alternative service.  
41 The policy plan is that NHS 111 will replace NHS Direct and there are significant implications  
42 to this strategy. NHS Direct was established to direct people to the right place but also in  
43 practice offers advice to people who do not need contact with a service. The emphasis of  
44 NHS 111 is on direction to right place rather than reassurance and self care advice. In our  
45 evaluation NHS 111 managed predominantly out of hours calls for urgent healthcare. If  
46 current callers to NHS Direct are shifted to NHS 111 the call volumes may increase  
47 substantially, the characteristics of the population using the service may change and  
48 consideration will need to be given to how the principles of NHS 111 in terms of immediate  
49 access without waiting, particularly for clinical advice, can be sustained.  
50  
51  
52  
53  
54  
55  
56  
57  
58  
59  
60



1  
2  
3  
4  
5  
6  
7 | ~~Fourth~~Third, another important question to consider is whether the introduction of NHS 111  
8 is creating supplier induced demand and therefore increasing overall demand for  
9 emergency and urgent care. There was some evidence from our system impact analysis that  
10 emergency and urgent care service use had increased overall but we cannot say if this is a  
11 real increase in demand or a shift from in hours GP services. It is possible that, once NHS  
12 111 is a national service with a higher profile, demand for the service could change either by  
13 generating new demand or by people using it as an alternative to in hours primary care, or a  
14 combination of both.  
15

16 Finally, it is useful to reflect on the expectations of the service. The provision of a telephone  
17 service which quickly guides people needing urgent care advice to the most appropriate  
18 service is sensible given repeatedly expressed concerns by the general public about  
19 confusion around which service to access when needing urgent care. Key aspects of the  
20 service such as an easy-to-remember number, emphasis on fast triage and smooth transfer  
21 to the 'right service, first time' are desired by the general public. In our evaluation we found  
22 that alongside implementation of NHS 111 there were various re-organisations of  
23 services and implementation of demand management schemes in both the pilot and control  
24 sites. It is probably unrealistic to expect any one service, such as NHS 111, to do everything  
25 and real improvements may only be gained when a series of co-ordinated measures  
26 designed to increase efficiency across all services are implemented.  
27  
28  
29

### 30 References

- 31  
32 1. Department of Health. Direction of Travel for Urgent Care.2006; [Online] Available at:  
33 [http://webarchive.nationalarchives.gov.uk/+www.dh.gov.uk/en/consultations/Liveconsultations/DH\\_4139428](http://webarchive.nationalarchives.gov.uk/+www.dh.gov.uk/en/consultations/Liveconsultations/DH_4139428)  
34  
35 2. O'Cathain, A., Coleman, P., Nicholl, J.. Characteristics of the emergency and urgent care  
36 system important to patients: a qualitative study. *Journal of Health Services Research &*  
37 *Policy* 2008;2: 19-25.  
38  
39 3. Department of Health. .High Quality Care for All: NHS Next Stage Review final report.  
40 2008[Online] Available at:  
41 [http://www.dh.gov.uk/en/Publicationsandstatistics/Publications/PublicationsPolicyAndGuidance/DH\\_085825](http://www.dh.gov.uk/en/Publicationsandstatistics/Publications/PublicationsPolicyAndGuidance/DH_085825)  
42  
43 4. NHS Connecting for Health. Introduction to NHS 111. 2011; [Online] Available at:  
44 <http://www.connectingforhealth.nhs.uk/systemsandservices/pathways/news/nhs111intro.pdf>  
45  
46 5. NHS Connecting for Health. NHS Pathways care narrative. 2012; [Online] Available at:  
47 <http://www.connectingforhealth.nhs.uk/systemsandservices/pathways/comms/corenav.pdf>  
48  
49 6. Department of Health. NHS 111 statistics. [Online] Available at:  
50 <http://transparency.dh.gov.uk/category/statistics/nhs-111-statistics>  
51  
52  
53  
54  
55  
56  
57  
58  
59  
60

- 1  
2  
3  
4  
5  
6  
7  
8  
9  
10  
11  
12  
13  
14  
15  
16  
17  
18  
19  
20  
21  
22  
23  
24  
25  
26  
27  
28  
29  
30  
31  
32  
33  
34  
35  
36  
37  
38  
39  
40  
41  
42  
43  
44  
45  
46  
47  
48  
49  
50  
51  
52  
53  
54  
55  
56  
57  
58  
59  
60
7. Campbell MJ. Time Series Regression in Encyclopedia of Biostatistics. Edited by Peter Armitage and Theodore Colton. John Wiley & Sons, Ltd, Chichester, 1998. (ISBN 0471 975761
  8. StataCorp. 2011. Stata: Release 12. Statistical Software. College Station, TX: StataCorp LP.
  9. Munro, J., Nicholl, J., O’Cathain, A., Knowles, E. et al, Evaluation of NHS Direct first wave sites. Final report of the phase I research. *Medical Care Research Unit*, 2001; University of Sheffield.
  10. Bunn, F., Byrne, G. and Kendall, S. The effects of telephone consultation and triage on healthcare use and patient satisfaction: a systematic review. *British Journal of General Practice* 2005; 55: 956-961.
  11. Munro, J.F., Nicholl, J.P., O’Cathain, A. and Knowles, E. Impact of NHS Direct on demand for immediate care: observational study. *British Medical Journal* 2000; 321: 150-3.
  12. Blank L, Coster J, O’Cathain A, Knowles E, Tosh J, Turner J, Nicholl J. The appropriateness of, and compliance with, telephone triage decisions: a systematic review and narrative synthesis. *Journal of Advanced Nursing* 2012; 68(12): 2610-2621.
  13. NHS Information Centre. Ambulance Services – 2011/2012. NHS Information Centre 2012;. [Online] Available at: <http://www.ic.nhs.uk/statistics-and-data-collections/audits-and-performance/ambulance/ambulance-services--england-2011-12>
  14. Snooks H, Griffiths L, Peconi J, Rance J, Snelgrove S, Sarangi S et al. Real Nursing? The development of telenursing. *Journal of Advanced Nursing* 2008; 61(6): 631-640.

#### Data Sharing:

A dataset of aggregated monthly contact counts for 5 emergency and urgent care services in 7 sites for 36 months is available on request from the corresponding author at

[j.turner@sheffield.ac.uk](mailto:j.turner@sheffield.ac.uk)

The Department of Health publish monthly open access activity data for NHS 111 services available at <http://transparency.dh.gov.uk/category/statistics/nhs-111-statistics/>

#### Acknowledgements:

We would like to thank: Professor Simon Dixon for advice about the economic analysis; Neil Shephard for statistical help with the system impact analysis and Dr Claire Ginn for obtaining the routine data used in the impact analysis.

#### Contributors:

JT and AOC conceived the study and designed it with help from JN and EK. JN conducted the system impact analysis. JT wrote the first draft of the paper. All authors assisted in the

1  
2  
3  
4  
5  
6  
7 interpretation of data and revising the paper and approved the final draft. JT is the  
8 guarantor.

9  
10 Funding:

11 The study was funded as an independent research project by the Policy Research  
12 Programme in the Department of Health. The Department of Health contributed to the  
13 development of the research questions to be addressed. The funders had no role in  
14 conducting the study, writing the paper or the decision to submit the paper for publication.  
15 The views expressed in this paper are not necessarily those of the Department of Health.

16  
17 Ethics:

18 The study was approved by the Leeds (Central ) Research Ethics Committee Reference  
19 number 10/H1313/57. NIHR CRN study ID: 9275

20 Competing interests:

21  
22 All authors have completed the Unified Competing Interest form at  
23 [www.icmje.org/coi\\_disclosure.pdf](http://www.icmje.org/coi_disclosure.pdf) (available on request from the corresponding author) and  
24 declare: the Department of Health Policy Research programme provided grant funding to  
25 the Medical Care Research Unit, University of Sheffield. AOC and JN are co-applicants on a  
26 research grant with NHS Direct studying tele-health for people with long term conditions. A  
27 family member of AOC won a contract to offer patient feedback for NHS 111 sites in London  
28 in June 2012.

29  
30  
31 The Corresponding Author has the right to grant on behalf of all authors and does grant on  
32 behalf of all authors, [a worldwide licence](#) to the Publishers and its licensees in perpetuity, in  
33 all forms, formats and media (whether known now or created in the future), to i) publish,  
34 reproduce, distribute, display and store the Contribution, ii) translate the Contribution into  
35 other languages, create adaptations, reprints, include within collections and create  
36 summaries, extracts and/or, abstracts of the Contribution, iii) create any other derivative  
37 work(s) based on the Contribution, iv) to exploit all subsidiary rights in the Contribution, v)  
38 the inclusion of electronic links from the Contribution to third party material where-ever it  
39 may be located; and, vi) licence any third party to do any or all of the above.  
40  
41  
42  
43  
44  
45  
46  
47  
48  
49  
50  
51  
52  
53  
54  
55  
56  
57  
58  
59  
60

Figure 1— Percentage of triaged NHS 111 calls allocated to each emergency and urgent care service in four pilots sites in first year of operation

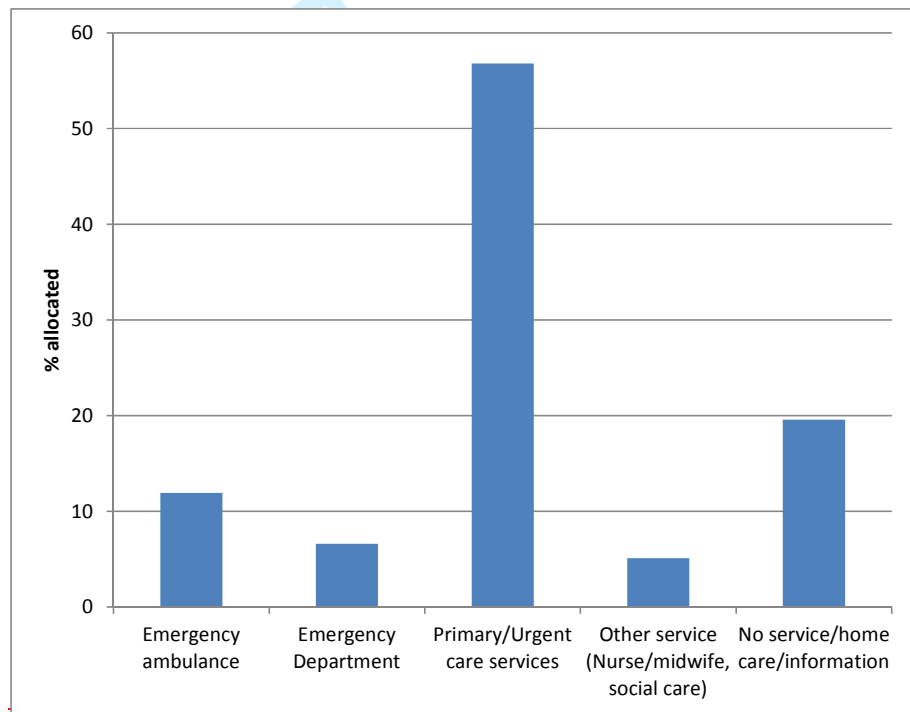

1  
2  
3  
4  
5  
6  
7  
8  
9  
10  
11  
12  
13  
14  
15  
16  
17  
18  
19  
20  
21  
22  
23  
24  
25  
26  
27  
28  
29  
30  
31  
32  
33  
34  
35  
36  
37  
38  
39  
40  
41  
42  
43  
44  
45  
46  
47  
48  
49

**Table 1: Demographic characteristics of pilot and control sites**

|                                                       | Pilot Sites                                |                       |                        |                           | Control Sites                                    |                        |                       |
|-------------------------------------------------------|--------------------------------------------|-----------------------|------------------------|---------------------------|--------------------------------------------------|------------------------|-----------------------|
|                                                       | Durham & Darlington                        | Nottingham            | Lincolnshire           | Luton                     | North of Tyne                                    | Norfolk                | Leicester City        |
| Population (000's)                                    | 620                                        | 305                   | 735                    | 700<br>(Northamptonshire) | 780                                              | 740                    | 280                   |
| SHA                                                   | North East                                 | East Midlands         | East Midlands          | East of England           | North East                                       | East of England        | East Midlands         |
| ONS Area Classification of Primary Care Organisations | Industrial Hinterlands                     | Centres with Industry | Prospering small towns | London Suburbs            | Industrial Hinterlands<br>Prospering small towns | Prospering small towns | Centres with Industry |
| ONS Rural/Urban Local Authority Classification        | Predominantly Urban<br>Predominantly Rural | Predominantly Urban   | Predominantly Rural    | Predominantly Urban       | Predominantly Urban<br>Predominantly Rural       | Predominantly Rural    | Predominantly Urban   |
| NHS 111 service live                                  | August 2010                                | November 2010         | November 2010          | December 2010             |                                                  |                        |                       |

**Table 2: Total numbers of NHS 111 calls received, answered, triaged and transferred for nurse assessment in one year**

|                                             | <b>Durham &amp; Darlington</b> | <b>Nottingham City</b> | <b>Lincolnshire</b> | <b>Luton</b>  | <b>All NHS 111 sites</b> |
|---------------------------------------------|--------------------------------|------------------------|---------------------|---------------|--------------------------|
| Population covered                          | 606,800                        | 300,800                | 700,300             | 194,300       | 1,802,200                |
| Total number of calls connected to 111      | 209,633                        | 58,397                 | 102,611             | 38,210        | 408,851                  |
| Direct dial 111 n (%)                       | 106,961 (51)                   | 18,354 (31.4)          | 102,611 (100)       | 23,264 (60.8) | 251,190 (61.4)           |
| Switched from other sources n (%)           | 102,672 (49)                   | 40,043 (68.6)          | 0                   | 14,946 (39.2) | 157,661 (38.6)           |
| Answerable calls n (%)                      | 165,355 (78.9)                 | 56,539 (96.8)          | 100,144 (97.6)      | 37,497 (98.1) | 359,535 (87.9)           |
| Answered calls n (% of answerable calls )   | 161,082 (97.4)                 | 55,564 (98.2)          | 99,381 (99.2)       | 37,073 (98.8) | 353,100 (98.2)           |
| Triaged calls n (% of answered calls)       | 114,686 (71.2)                 | 44,937 (80.9)          | 85,509 (86.0)       | 32,031 (86.4) | 277,163 (78.5)           |
| Transferred to nurse n (% of triaged calls) | 24,488 (21.3)                  | 13,261 (29.5)          | 28,871 (33.7)       | 10,779 (33.6) | 77,399 (27.9)            |
| Triaged calls per year per 1,000 people     | 189                            | 150                    | 122                 | 165           | 154                      |

1  
2  
3  
4  
5  
6  
7  
8  
9  
10  
11  
12  
13  
14  
15  
16  
17  
18  
19  
20  
21  
22  
23  
24  
25  
26  
27  
28  
29  
30  
31  
32  
33  
34  
35  
36  
37  
38  
39  
40  
41  
42  
43  
44  
45  
46  
47  
48  
49

Table 3 Summary of estimated effects of NHS 111 on other emergency and urgent care services: % change in monthly activity counts

| Service activity                                                                         | <a href="#">Pilot only model</a> - Estimated change in monthly service activity per 1000 triaged NHS 111 calls <a href="#">after the introduction of NHS 111</a> | Pilot v Control model – estimated % change in monthly activity (95%CI) <a href="#">in pilot sites compared to control sites after the introduction of NHS 111</a> |
|------------------------------------------------------------------------------------------|------------------------------------------------------------------------------------------------------------------------------------------------------------------|-------------------------------------------------------------------------------------------------------------------------------------------------------------------|
| ED attendances                                                                           | -1 (-66, +64) fewer attendances                                                                                                                                  | -0.1% (-3.8%, +3.7%)                                                                                                                                              |
| GPOOH, WiC, UCC, MIU attendances                                                         | +47 (-66, +159) extra attendances                                                                                                                                | +2.5% (-3.5%, +8.5%)                                                                                                                                              |
| Calls to NHS Direct                                                                      | -102 (-130, -74) fewer calls                                                                                                                                     | -19.3% (-24.6%, -14.0%)                                                                                                                                           |
| Calls to 999 ambulance service                                                           | +3 (-31, +37) more calls                                                                                                                                         | +0.3% (-3.1%, +3.7%)                                                                                                                                              |
| Ambulance 999 incidents <a href="#">where an ambulance arrives at the incident scene</a> | +24 (+8, +39) more incidents                                                                                                                                     | +2.9% (+1.0%, +4.8%)                                                                                                                                              |

\*Net change is the change (before to after) in the pilot sites minus the change in the control sites.

Formatted Table

**Table 4: Average monthly contacts (000s) with services in the emergency and urgent care system before and after the launch of NHS 111 (based on routine data)**

|                                                                                                               | Durham & Darlington | Change (%) | Nottingham | Change (%) | Luton  | Change (%) | Lincolnshire | Change (%) |       |       |       |       |
|---------------------------------------------------------------------------------------------------------------|---------------------|------------|------------|------------|--------|------------|--------------|------------|-------|-------|-------|-------|
|                                                                                                               | Before              | After      | Before     | After      | Before | After      | Before       | After      |       |       |       |       |
| EDs                                                                                                           | 13675               | 13142      | -3.9       | 7505       | 7945   | +5.8       | 3474         | 3638       | +4.7  | 14293 | 14117 | -1.2  |
| Urgent                                                                                                        | 13667               | 14729      | +7.7       | 8561       | 9424   | +11        | 7573         | 6135       | -19   | 12374 | 13222 | +6.8  |
| NHS Direct                                                                                                    | 3978                | 2201       | -44.7      | 3016       | 2186   | -27.5      | 1547         | 1068       | -31   | 3660  | 2655  | -27.2 |
| Ambulance calls                                                                                               | 6479                | 6895       | +6.4       | 4824       | 5319   | +10.3      | 2626         | 2857       | +8.8  | 7307  | 8480  | +16.1 |
| Ambulance incidents                                                                                           | 5304                | 5734       | +8.1       | 4276       | 4538   | +6.1       | 2239         | 2488       | +11.1 | 6989  | 7657  | +9.6  |
| All services                                                                                                  | 43103               | 42701      | -1         | 28182      | 29412  | +4.2       | 17459        | 16186      | -7.3  | 44623 | 46131 | +3.3  |
| Estimated NHS 111                                                                                             | 0                   | 10000      |            | 0          | 3500   |            | 0            | 3000       |       | 0     | 10000 |       |
| Total with NHS 111                                                                                            | 43103               | 52701      | +18.2      | 28182      | 32914  | +14.4      | 17459        | 19186      | +9.1  | 44623 | 56131 | +20.5 |
| Total contacts assuming all NHS Direct calls taken by NHS 111                                                 | 43103               | 50924      | +15.4      | 28182      | 32084  | +12.2      | 17459        | 18707      | +6.7  | 44623 | 55126 | +19   |
| Total contacts assuming all NHS Direct calls taken by NHS 111 and all estimated GP OOH calls taken by NHS 111 | 48003               | 50924      | +5.7       | 30582      | 32084  | +4.7       | 17459        | 18707      | +6.7  | 48523 | 55126 | +12   |



## **S1: NHS 111 service description**

### **Core service principles**

The underlying principle of NHS 111 is that patients who request urgent medical care should be assessed and directed to the “right service first time”. The main features of the service are that:

- The number is memorable and is free to use.
- Calls are assessed using an approved clinical assessment system to determine the most appropriate course of action for the patient at the first point of contact.
- Clinical assessment and provision of information, including clinician assessment, is completed on the first call without the need for a call back.
- Callers can be given health information, self care advice or directed to the most appropriate service available at the time of the call using an up to date skills based Directory of Services (DoS) for the patient’s local area and without the need for re-triage.
- Where possible the NHS 111 service should develop real time links with urgent care providers so that information can be forwarded and appointments can be made for callers at the time of their call to NHS 111.
- Calls assessed as requiring an emergency ambulance response can be immediately directed to ambulance dispatch without the need for re-assessment.

NHS 111 therefore provides an integrated service that links clinical assessment with the services that are appropriate and available at the time of the call.

## NHS 111 operational framework

Figure 4.1 illustrates the framework for the intended NHS 111 service during the initial pilot phase of the programme.

Figure 4.1 – Diagrammatic plan of the NHS 111 service



Source – NHS 111 Programme Board, 111 Service Specification version 1.2, May 2010

The operational framework consists of four linked steps:

1. *Access via the 111 telephone number* – Calls to NHS 111 can be routed in several ways and can be configured differently for different areas. The service can be accessed by callers only dialling 111, they may call another service such as a GP out of hours service and be asked to dial 111, or they may call another service and the call can be automatically switched to NHS 111 without the caller having to redial.
2. *Answer* – Calls are answered by a call handling service contracted to provide this service. The call handling service collects basic call details and then carries out the next step of clinical assessment.
3. *Clinical assessment* – In all four pilot sites a single clinical assessment system, NHS Pathways, is used as the clinical assessment system. NHS Pathways is a symptom based clinical assessment system used to triage calls from the public requesting emergency or

1  
2  
3 urgent healthcare and is used by ambulance services, GP out of hours services and other  
4 Single Point of Access telephone services for urgent care. The assessment is made by  
5 trained, non-clinical call advisors with clinician support available either on site. As call  
6 advisors ask symptom based questions, the answers to key indicator questions are flagged.  
7 The information from these answers is then used to match the clinical skills needed and the  
8 speed of response required for the clinical condition described to an appropriate service in  
9 step 4. In all sites most calls that may be suitable for self care advice or require referral to  
10 specialist services are transferred for clinical advice before a final disposition is reached.  
11  
12  
13

- 14  
15  
16 4. *A web based Capacity Management System and Directory of Skills & Services (CMS/DoS)* is  
17 linked to the NHS Pathways clinical assessment system. This directory is populated locally  
18 and jointly by service commissioners and provider services. The available skills of each  
19 provider are specified, as are service operation guidance such as location, referral protocols  
20 and opening times. Services are matched to the clinical indicator flags in the clinical  
21 assessment system and appear to the call advisor in the order set by the service  
22 commissioner. The Capacity Management System operates in real time, taking account of  
23 what is available and current activity. This enables a call for urgent care to be automatically  
24 matched to a service with the right skills, location and within the required timeframe at the  
25 time of the call without having to manually search for an appropriate service. Where adequate  
26 technical links can be set up, appointments or other contacts can be made by the call adviser  
27 at the time of the call. Any provider service can be included in the CMS/DoS but, to ensure  
28 clinical safety, only some will be available for referral by an NHS Pathways call advisor. Other  
29 services, for example specialist nursing services, require additional clinician assessment  
30 before a referral can be made. The CMS/DoS system also provides activity and referral data  
31 for service monitoring and planning.  
32  
33  
34  
35  
36  
37  
38

39 These four steps provide the overall framework for an NHS 111 service but within each step there are  
40 choices that can be made about how the service is delivered at a local level. Table 1 summarises the  
41 operating models used in the four pilot sites and illustrates the different approaches used.  
42  
43  
44  
45  
46  
47  
48  
49  
50  
51  
52  
53  
54  
55  
56  
57  
58  
59  
60

**Table 1: Description of four pilot site NHS 111 service models**

|                     | CDD                                                                                                                                                                                                                                                                                                                           | Nottingham                                                                                                                                                                                                                                                                  | Lincolnshire                                                                                                                                                                                                                                                                | Luton                                                                                                                                                                                                                                                                                                                                        |
|---------------------|-------------------------------------------------------------------------------------------------------------------------------------------------------------------------------------------------------------------------------------------------------------------------------------------------------------------------------|-----------------------------------------------------------------------------------------------------------------------------------------------------------------------------------------------------------------------------------------------------------------------------|-----------------------------------------------------------------------------------------------------------------------------------------------------------------------------------------------------------------------------------------------------------------------------|----------------------------------------------------------------------------------------------------------------------------------------------------------------------------------------------------------------------------------------------------------------------------------------------------------------------------------------------|
| Call routing        | <p>Direct dial 111</p> <p>Auto routed to 111 from Single Point of Access number</p>                                                                                                                                                                                                                                           | <p>Direct dial 111</p> <p>Auto routed to 111 from GP out of hours numbers</p>                                                                                                                                                                                               | <p>Direct dial 111 only (Nov 2010 – Mar 2011)</p> <p>All calls are 111 – no auto routed calls</p> <p>1<sup>st</sup> April 2011 onwards all GP out of hours calls given message to call 111</p>                                                                              | <p>Direct dial 111</p> <p>Auto routed to 111 from some GP out of hours numbers</p> <p>Other GP out of hours numbers have a message telling caller to call 111</p>                                                                                                                                                                            |
| Call answering      | <p>Call handling provided by North East Ambulance Service Foundation Trust</p> <p>Service provided from ambulance emergency control centre in Newcastle on Tyne utilising emergency call control centre in hours and Patient Transport Service control centre at peak NHS 111 call times.</p>                                 | <p>Call handling provided by NHS Direct national system</p> <p>Calls routed to NHS Direct using a separate number and identified within the system as Nottingham 111 or Nottingham OOH</p>                                                                                  | <p>Call handling provided by NHS Direct national system</p> <p>Calls routed to NHS Direct using a separate number and identified within the system as Lincolnshire 111</p>                                                                                                  | <p>Call handling provided by NHS Direct national system</p> <p>Calls routed to NHS Direct using a separate number and identified within the system as Luton 111</p>                                                                                                                                                                          |
| Clinical Assessment | <p>NHS Pathways using trained call advisors and on site nurse or paramedic clinical advice and supervision.</p>                                                                                                                                                                                                               | <p>NHS Pathways using trained call advisors and NHS Direct nurse advisors for clinical advice and supervision.</p>                                                                                                                                                          | <p>NHS Pathways using trained call advisors and NHS Direct nurse advisors for clinical advice and supervision.</p>                                                                                                                                                          | <p>NHS Pathways using trained call advisors and NHS Direct nurse advisors for clinical advice and supervision.</p>                                                                                                                                                                                                                           |
| CMS/DoS             | <p>Initial directory was existing directory and populated with services identified from commissioner led workshops and review meetings. Directory reflected urgent care reform and service remodelling that occurred prior to NHS 111. Current directory population built on this and led by PCT commissioner and a local</p> | <p>Two versions of directory have been populated. Initially populated by PCT leads who interacted with local providers. Second version using national clinical content templates was overseen by steering group with engagement with leads from provider organisations.</p> | <p>Two versions of directory have been populated. Initially populated by PCT leads who interacted with local providers. Second version using national clinical content templates was overseen by steering group with engagement with leads from provider organisations.</p> | <p>Population of directory has been a stepped process. Early phase contained primary care, urgent care and Out of Hours providers.</p> <p>Two additional re-populations and re-profiling edits in 2011 using national templates with additional services e.g. mental health, community services, social care added. Local engagement and</p> |

|                                   |                                                                                                                                                                                                                                                                                                                                            |                                                                                                                                                                                                                                                                                                                                                  |                                                                                                                                                                                                                                                                                                                                                  |                                                                                                                                                                                                                                                                                                                                                   |
|-----------------------------------|--------------------------------------------------------------------------------------------------------------------------------------------------------------------------------------------------------------------------------------------------------------------------------------------------------------------------------------------|--------------------------------------------------------------------------------------------------------------------------------------------------------------------------------------------------------------------------------------------------------------------------------------------------------------------------------------------------|--------------------------------------------------------------------------------------------------------------------------------------------------------------------------------------------------------------------------------------------------------------------------------------------------------------------------------------------------|---------------------------------------------------------------------------------------------------------------------------------------------------------------------------------------------------------------------------------------------------------------------------------------------------------------------------------------------------|
|                                   | <p>provider capacity manager. Engagement events held with primary care providers to agree arrangements for in hours care. Over time additional services have been added allowing referrals to e.g. district nurses, nurse specialists.</p> <p>Transport can also be arranged for eligible patients to attend appointments made by 111.</p> |                                                                                                                                                                                                                                                                                                                                                  |                                                                                                                                                                                                                                                                                                                                                  | <p>involvement has increased with each review.</p> <p>Another re-population planned for 2012.</p>                                                                                                                                                                                                                                                 |
| Technical links for warm transfer | <p>Ambulance service emergency system for immediate ambulance dispatch</p> <p>Urgent Care Services so appointments can be made by the NHS 111 call advisor while the caller is still on the telephone</p>                                                                                                                                  | <p>Ambulance service emergency system for immediate ambulance dispatch</p> <p>Calls can be warm transferred (i.e. no call back) to OOH provider for appointment booking</p>                                                                                                                                                                      | <p>Ambulance service emergency system for immediate ambulance dispatch</p> <p>Calls can be warm transferred (i.e. no call back) to OOH provider for appointment booking</p>                                                                                                                                                                      | <p>Manual dispatch of ambulances using agreed protocol</p> <p>Calls can be warm transferred (i.e. no call back) to booking agents within NHS Direct who book Out of Hours appointments with primary care services</p>                                                                                                                             |
| Training                          | <p>New staff recruited</p> <p>Standard NHS Pathways training. Additional training on safeguarding, negotiation skills, NHS 111 values, unscheduled care system. NHS 111 co-located with emergency ambulance control and both use NHS Pathways so call handlers can be used flexibly for either service when high demand.</p>               | <p>Existing NHS Direct call handling staff re-trained</p> <p>Standard NHS Pathways training. Extension of role as now assessing patient on initial call. Additional training on transfer processes for OOH and ambulance dispatch. Safeguarding, record keeping and communication skills training already included in call handler training.</p> | <p>Existing NHS Direct call handling staff re-trained</p> <p>Standard NHS Pathways training. Extension of role as now assessing patient on initial call. Additional training on transfer processes for OOH and ambulance dispatch. Safeguarding, record keeping and communication skills training already included in call handler training.</p> | <p>Existing NHS Direct call handling staff re-trained</p> <p>Standard NHS Pathways training. Extension of role as now assessing patient on initial call.. Additional training on transfer processes for OOH and ambulance dispatch. Safeguarding, record keeping and communication skills training already included in call handler training.</p> |
| Public Launch                     | August 2010                                                                                                                                                                                                                                                                                                                                | November 2010                                                                                                                                                                                                                                                                                                                                    | November 2010                                                                                                                                                                                                                                                                                                                                    | December 2010                                                                                                                                                                                                                                                                                                                                     |

## S2: Criteria used to identify suitable control sites

| Indicator                                | Description                                                                                                                                   | Data source                                                                                                 |
|------------------------------------------|-----------------------------------------------------------------------------------------------------------------------------------------------|-------------------------------------------------------------------------------------------------------------|
| <b>Demographics</b>                      |                                                                                                                                               |                                                                                                             |
| Population size                          | Target population (thousands)                                                                                                                 | PCT publications                                                                                            |
| Persons 65+                              | Proportion of people 65 and over (%)                                                                                                          | Office of National Statistics (2008 estimates)                                                              |
| Ethnicity                                | Proportion of BME population (%)                                                                                                              | Office of National Statistics (2007 data)                                                                   |
| Life expectancy                          | Life expectancy at birth for males/females (years)                                                                                            | The NHS Information Centre, Compendium of Clinical and Health Indicators (2006-2008 data)                   |
| Deprivation value                        | Proportion of people living in 20% most deprived areas of England (%)                                                                         | The Association of Public Health Observatories (2007 data)                                                  |
| <b>Lifestyle</b>                         |                                                                                                                                               |                                                                                                             |
| Alcohol                                  | Proportion of binge drinking adults (%)                                                                                                       | The NHS Information Centre, Health surveys for England 2003-2005                                            |
| Smoking                                  | Proportion of smoking adults (%)                                                                                                              |                                                                                                             |
| Obesity (adults)                         | Proportion of obese adults (%)                                                                                                                |                                                                                                             |
| Obesity (children)                       | Proportion of obese year 6 children (%)                                                                                                       | The NHS Information Centre, National Child Measurement Programme: England, 2008/09 school year              |
| <b>Health profile</b>                    |                                                                                                                                               |                                                                                                             |
| Mortality rate, all causes               | Directly age-standardised rate per 100000 population under 75                                                                                 | The NHS Information Centre, Compendium of Clinical and Health Indicators (2006-2008 data)                   |
| Mortality rate, all cancers              | Directly age-standardised rate per 100000 population under 75                                                                                 |                                                                                                             |
| Mortality rate, all circulatory diseases | Directly age-standardised rate per 100000 population under 75                                                                                 |                                                                                                             |
| People with limiting long-term illness   | Proportion of people with limiting long-term illness, 2001 Census                                                                             | Office of National Statistics (2001 Census data)                                                            |
| People with long-term conditions         | Proportion of respondents who reported a long-standing health problem in GP Patient Survey (%)                                                | GP Patient Survey 2008/09                                                                                   |
| <b>Use of health services</b>            |                                                                                                                                               |                                                                                                             |
| A&E attendances                          | Attendance rate per 1000 population, includes A&E Departments, Walk in Centres and Minor Injury Units                                         | Department of Health, QMAE data 2007/08                                                                     |
| GP consultations                         | General Practices consultations combined rate per 1000 population (include GP and practice nurse consultations, estimates from national data) | The NHS Information Centre, QResearch report on trends in consultation rates in General Practices 1995-2008 |
| GP out of hours contacts                 | Proportion of respondents of the GP Patient Survey who tried to contact OOH GP service in the last 6 months (%)                               | GP Patient Survey 2008/09                                                                                   |
| NHS Direct calls                         | Call rate per 1000 population                                                                                                                 | NHS Direct, 2008/09 data                                                                                    |

1  
2  
3  
4  
5  
6  
7  
8  
9  
10  
11  
12  
13  
14  
15  
16  
17  
18  
19  
20  
21  
22  
23  
24  
25  
26  
27  
28  
29  
30  
31  
32  
33  
34  
35  
36  
37  
38  
39  
40  
41  
42  
43  
44  
45  
46  
47  
48  
49  
50  
51  
52  
53  
54  
55  
56  
57  
58  
59  
60

**Figure 1 – Percentage of triaged NHS 111 calls allocated to each emergency and urgent care service in four pilots sites in first year of operation**

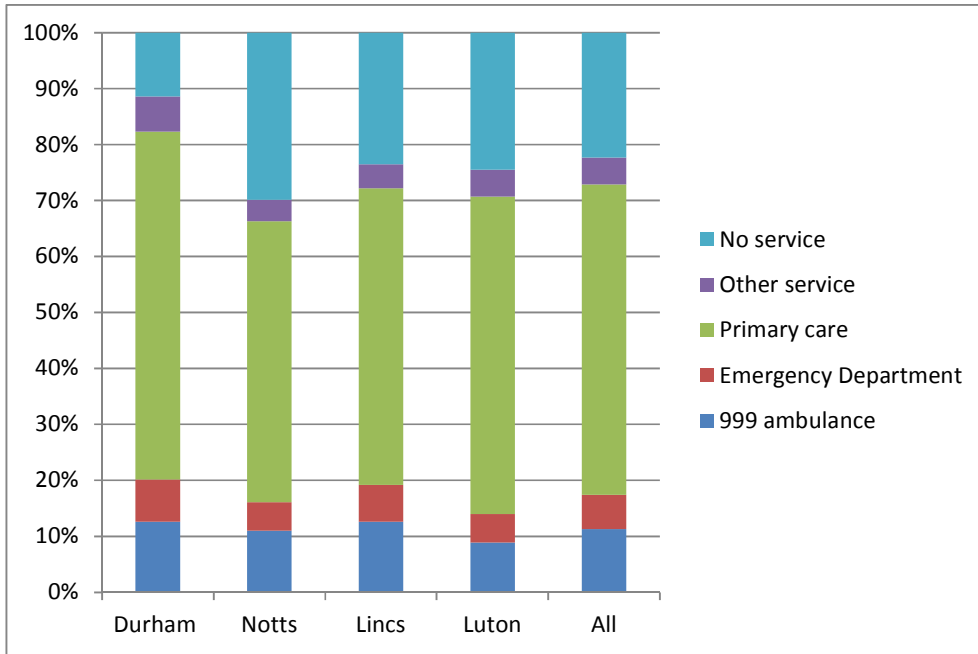

Review only

**Figure 1 – Percentage of triaged NHS 111 calls allocated to each emergency and urgent care service in four pilots sites in first year of operation**

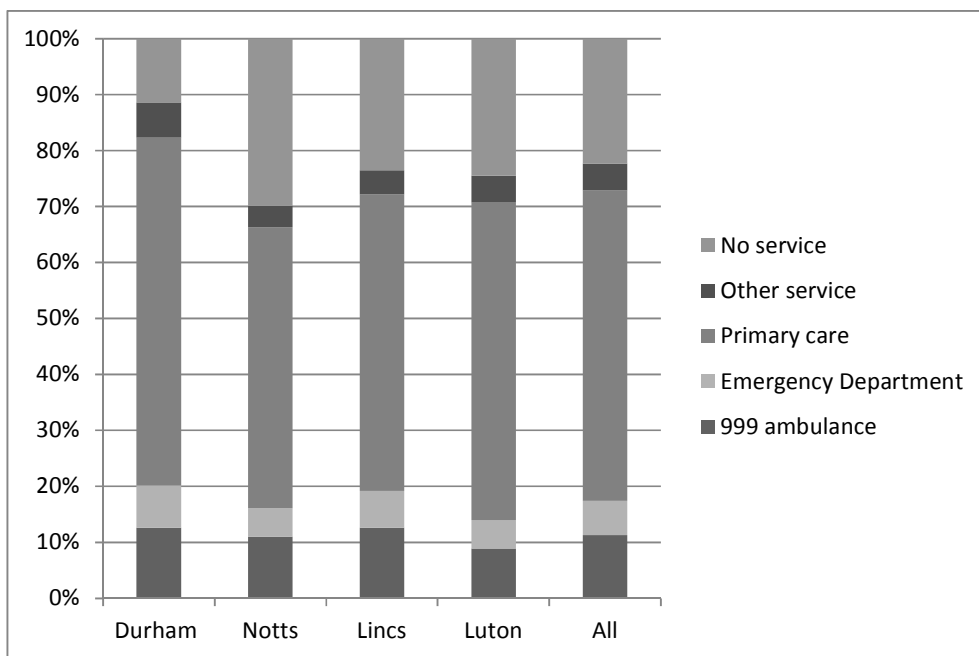

Review only
